1  
2  
3  
4  
5  
6  
7  
8  
9  
10  
11  
12  
13  
14  
15  
16  
17  
18  
19  
20  
21  
22  
23  
24  
25

**Core architecture of a bacterial type II secretion system**

**Authors:** Anastasia A Chernyatina and Harry H Low\*

Department of Life Sciences, Imperial College, London, SW7 2AZ, UK

\*Corresponding author:

Harry H. Low

Department of Life Sciences, Imperial College, London, SW7 2AZ, UK

Phone: +44 207 594 3064

Email: [h.low@imperial.ac.uk](mailto:h.low@imperial.ac.uk)

26 **Summary**

27 **Bacterial type II secretion systems (T2SS) translocate virulence factors, toxins and**  
28 **enzymes across the cell outer membrane (OM). An assembled T2SS has not yet**  
29 **been isolated in vitro. Here we use a fusion of negative stain and cryo-electron**  
30 **microscopy (EM) to reveal the core architecture of an assembled T2SS from the**  
31 **pathogen *Klebsiella pneumoniae*. We show that 7 proteins form a ~2.5 MDa**  
32 **complex that spans the cell envelope. The outer membrane complex (OMC)**  
33 **includes the secretin PulD with all domains modelled and the pilotin PulS. The**  
34 **inner membrane assembly platform (AP) components PulC, PulE, Pull, PulM and**  
35 **PulN have a relative stoichiometric ratio of 2:1:1:1:1, respectively. The PulE**  
36 **ATPase, Pull and PulM combine to form a flexible hexameric hub. Symmetry**  
37 **mismatch between the OMC and AP is overcome by PulC linkers spanning the**  
38 **periplasm with PulC HR domains binding independently at the secretin base. Our**  
39 **results show the T2SS to have a highly dynamic modular architecture with**  
40 **implication for pseudo-pilus assembly and substrate loading.**

41

42 **Keywords**

43 **Type II secretion system, bacterial secretion, assembly platform, secretin, cryo-EM,**  
44 **macro-molecular complex.**

45

46

47

48

49

50

## 51 **Introduction**

52 The bacterial T2SS is found in human pathogens such as *Acinetobacter baumannii*,  
53 *Chlamydia trachomatis*, *Escherichia coli* and *Vibrio cholerae*<sup>1</sup>. It secretes a broad  
54 repertoire of substrates including digestive enzymes and infective agents like the cholera  
55 and heat-labile (LT) toxins<sup>2</sup>. Between 12-15 genes in a single operon usually encode the  
56 majority of T2SS components. Whilst the soluble domains for many of these proteins have  
57 been solved by X-ray crystallography<sup>3,4</sup>, their relative stoichiometry, mode of association  
58 with binding partners, and temporal coordination for assembling a functional secretion  
59 apparatus is still poorly understood.

60 The protein GspD forms a 15-fold rotationally symmetric pore termed the secretin  
61 that inserts into the OM and provides a conduit for substrate into the external  
62 environment. OM insertion is usually dependent on a lipidated pilotin<sup>5</sup>, which binds to  
63 the GspD C-terminal S-domain with 1:1 stoichiometry<sup>6,7</sup>. The pilotin gene is often  
64 chromosomally discrete from the main T2SS operon. Multiple recent high-resolution  
65 cryo-EM structures report the partial secretin architecture<sup>8-10</sup>, and in complex with the  
66 pilotin<sup>7</sup>. However, the entire secretin has not yet been fully resolved due to disorder in  
67 the periplasmic N0 and N1 domains.

68 Within the inner membrane (IM), GspL and GspM are bitopic and monotopic  
69 membrane proteins, respectively, that together form homo- and hetero-dimers<sup>11</sup>.  
70 Combined with the polytopic membrane protein GspF<sup>12</sup> and the ATPase GspE, these  
71 proteins form an assembly platform (AP) for the pseudo-pilus<sup>13</sup>. The pseudo-pilus  
72 constitutes a helical filament that extrudes fully-folded substrate through the secretin  
73 channel. The relative stoichiometry and overall ultrastructure of the AP is unknown. GspE  
74 is a cytoplasmic AAA+ ATPase that energises the T2SS and drives pilin assembly and  
75 pseudo-pilus formation. The active state is considered to be a hexameric ring as ATP

76 turnover is significantly upregulated in an artificially oligomerized GspE-Hcp1 fusion<sup>14</sup>.  
77 The homologous ATPases PilB and PilT in the closely related type IV pilus (T4P) system  
78 also function as hexamers<sup>15,16</sup>. Ultimately, the functional oligomeric state and  
79 stoichiometry of GspE within the T2SS apparatus has not yet been determined. The GspE  
80 N-terminal N1E domain connects to the N2E domain with an extended linker. A shorter  
81 but known flexible linker connects the N2E domain to the C-terminal CTE ATPase  
82 domain<sup>17</sup>. Such inherent flexibility within GspE is predicted to facilitate large-scale  
83 conformational changes. The N1E domain of GspE forms a 1:1 stoichiometric complex  
84 with the cytoplasmic domain of GspL<sup>17,18</sup>. These two proteins contact GspF<sup>13,19</sup>, which is  
85 predicted to reside centrally within the AP. Concerted interplay between the GspE, GspL  
86 and GspF complex are thought crucial for coupling GspE conformational changes to the  
87 mechanical loading of pilin subunits within the pseudo-pilus assembly<sup>20,21</sup>. As GspL is a  
88 bitopic membrane protein, the direct contact between GspE and GspL also represents a  
89 mechanism for enabling cross-talk across the inner-membrane to other periplasmic  
90 components such as GspM. The coupling of the AP and OMC across the cell envelope is  
91 mediated by GspC, where the GspC N-terminus associates with GspL and GspM within the  
92 inner membrane<sup>11</sup>. The C-terminus of GspC must then span the periplasm as the GspC  
93 HR domain binds the GspD N0 domain<sup>22</sup>. Despite the known interaction between GspC  
94 HR domain and GspD N0 domain, the precise arrangement of GspC HR domain at the base  
95 of the secretin remains unclear<sup>22</sup>. Similarly, understanding how GspC HR domains bind  
96 to the secretin is important for determining how the likely symmetry mismatch between  
97 AP and OMC components is overcome.

98         Here we isolate an assembled T2SS so that both OM and IM components are  
99 captured together. Using a fusion of cryo and negative stain EM, combined with  
100 stoichiometry measurements, we provide a reconstruction of the entire OMC and a model

101 for the cytoplasmic components of the AP. Combined they reveal a glimpse at the core  
102 ultrastructure of this cell envelope spanning nanomachine.

103

## 104 **Results**

### 105 **Purification, EM and stoichiometry of Pul<sub>CDELMNS</sub>**

106 The T2SS from the human pathogen *K. pneumoniae* HS11286 strain comprises 13 genes  
107 in a single unidirectional operon termed PulC through to PulO (Figure 1A). Note that Pul  
108 and Gsp nomenclature relate to equivalent proteins in homologous T2SS systems. The  
109 pilotin PulS is located in a separate position within the chromosome. These 14 genes were  
110 cloned and over-expressed in *Escherichia coli*. Using affinity chromatography tags  
111 positioned on the cytoplasmic ATPase PulE and the periplasmic pilotin PulS, a complex  
112 containing 7 components was purified by two successive pulldowns. Glutaraldehyde  
113 stabilization was included after the initial pulldown. The complex comprised PulC, PulD,  
114 PulE, PulL, PulM, PulN and PulS, and is here termed Pul<sub>CDELMNS</sub> (Figure 1B). SDS-PAGE  
115 band identification was confirmed by LC-MS/MS. It is unclear why PulF and pseudo-pilus  
116 components were not co-purified with Pul<sub>CDELMNS</sub>. Their inclusion may require intact  
117 membrane for stabilization. Co-expression of PulA substrate or *pulG* knockout did not  
118 promote their inclusion. Trace quantities of GspJ and GspK were identified on the gel by  
119 LC-MS/MS suggesting the pseudo-pilins were at least partially expressed. Visualisation  
120 of Pul<sub>CDELMNS</sub> by negative stain EM yielded particles ~40 nm long and 17-22 nm wide  
121 (Figure 1C). The OMC PulD secretin was readily identifiable within 2D class averages.  
122 Hanging beneath the OMC and separated by a 5-10 nm gap the inner membrane AP was  
123 observed. Highly flexible linkers connect the OMC and AP so that these two assemblies  
124 effectively constitute independent particles tethered together. The Pul<sub>CDELMNS</sub> complex  
125 was vitrified on thin carbon film and imaged by cryo-EM (Figure 1C). 2D class averages

126 of Pul<sub>CDELMNS</sub> yielded well resolved side views of the OMC. All domains of PulD were  
127 identifiable with additional densities observed at the base of the secretin where the PulC  
128 HR domain was expected to bind to the N0 domain<sup>22</sup>, and where PulS decorates the  
129 exterior of the secretin core<sup>7</sup> (Figure 1C). The AP was not resolved here due to high  
130 flexibility and averaging effects. In the absence of glutaraldehyde, the OMC sometimes  
131 separated from the AP and yielded top views, which confirmed PulD and PulS in 1:1  
132 stoichiometric ratio<sup>7</sup> with C15 symmetry (Figure 1C). The relative stoichiometry of the  
133 inner membrane AP components were determined by SDS-PAGE densitometry and  
134 quantification of fluorescent emission using both Coomassie R250 and Sypro Ruby  
135 dyes<sup>23,24</sup> (Figure 1B). Pul<sub>C:E:L:M:N</sub> relative mean ratios standardized around PulE were  
136 observed as 2.13:1.00:0.97:0.99:0.95, which is consistent with an overall relative ratio of  
137 2:1:1:1:1 for these components. The relative ratios of PulE and PulL were tightly  
138 correlated ( $\sigma = 0.07$ ), which is important as it reflects their known 1:1 interaction  
139 <sup>17,18</sup> and acts as an internal control for the gel densitometry. PulC stoichiometry was at  
140 least twice that of the other AP components with a relatively broad variance ( $\sigma =$   
141 0.19). The 15-fold copy numbers of PulD or PulS were not used as a reference to  
142 determine an overall copy number for the AP components within the Pul<sub>CDELMNS</sub> complex.  
143 PulD remained partially multimerized despite phenol treatment so that it failed to  
144 consistently enter and migrate through the gel fully. PulS quantity was significantly  
145 enriched as a consequence of the PulD secretin decoupling from the AP in the absence of  
146 glutaraldehyde stabilization during purification.

147

#### 148 **PulD secretin structure determination**

149 Focused refinement of the OMC yielded a reconstruction with an overall resolution of 4.3  
150 Å (Figure 2 and Figure S1). All domains of PulD were resolved with sufficient map quality

151 (Figure S2A) to build a complete model of the monomer and the secretin, excluding the  
152 amino acids (aa) in loops 288-303, 462-470 and 632-637 (Figure 3 and 4A, and Figure  
153 S3). The PulD fold is similar to partial *Escherichia coli* K12 and H10407 GspD models  
154 (RMSD C $\alpha$  = 3.2 Å and 3.3 Å) where the secretin core and N3 domain have been described,  
155 along with homology modelled N2 and N1 domains<sup>7,10</sup> (Figure 4B). The entire secretin is  
156 20 nm long with an external diameter of 15 nm at the base (Figure 2B and Figure 3). It  
157 includes an occluding central gate and N3 domain constriction sites within the secretin  
158 channel. It lacks a *Vibrio cholerae* cap gate<sup>10</sup>. The N1, N2 and N3 domains pack tightly  
159 (Figure 5) with a diagonal offset of 36°. N0 is positioned almost directly below the N1  
160 domain and does not maintain the diagonal offset. The N0 fold is similar to that described  
161 in multiple crystal structures<sup>22,25,26</sup> with a core of two helices flanked on each side by  $\beta$ -  
162 sheets. However, its position relative to the N1 domain within the secretin is significantly  
163 different to these crystal structures where crystal contacts appear to have dominated  
164 domain arrangement (Figure S2B). The N0 and N1 domains are connected by loop 7,  
165 which constitutes a substantial 26 aa linker. The N-terminus of loop 7 forms a wedge that  
166 packs between neighboring N1 domains. Its C-terminus partially envelops the proximal  
167 N1 domain whilst making additional secondary contacts with N0 domain helix 2 (Figure  
168 3A and Figure 5D). The N0 domains form a tightly packed ring with alternating stacked  
169  $\beta$ -sheets sandwiched between helices 2 and 4 (Figure 5D). Failure to stabilize the N0  
170 domain and to promote formation of the loop 7 wedge likely accounts for the previously  
171 reported N0, N1 and N2 domain flexibility in other systems<sup>7-10,27</sup>. Overall, a single PulD  
172 monomer has a radial twist around the secretin long axis of 130° (Figure 3C).

173

174 **PulC HR domain binds at the secretin base**

175 Hanging beneath the N0 domains in the OMC map, additional globular densities at 7-8 Å  
176 resolution protrude from the secretin base (Figure 2 and Figure S1B). Focused  
177 refinements<sup>28</sup> failed to markedly improve resolution. These densities were predicted to  
178 be the PulC HR domain given its known interaction with the PulD N0 domain in  
179 homologous systems<sup>22,29</sup>. Using the GspC HR domain and GspD N0 domain crystal  
180 structure<sup>22</sup> as a reference, a homology model of PulC HR domain was fitted as a rigid body  
181 (Figure S2C). The model closely follows the surface envelope of the map in this region,  
182 with a pair of triple  $\beta$ -sheets opposed around a central cavity (Figure 2C). Based on the  
183 quality of this fit, the PulC HR domain was assigned to each globular protrusion.  
184 Importantly, each PulC HR domain binds to only a single PulD N0 domain and has no  
185 contact with neighbouring PulC HR domains. Overall, the binding of the PulC HR domain  
186 to the PulD N0 domain appears to be important for the correct positioning of the N0  
187 domain within the secretin and the subsequent stabilization of the N1 and N2 domains.  
188 Additional stabilization is derived from a plug that occludes the lumen of the secretin at  
189 the level of the N0-N1 domains (Figure 2B). The plug was observed in both the 2D class  
190 averages (Figure 1B) and the 3D reconstruction. The high-resolution plug ultrastructure  
191 was not resolved due to a likely symmetry mismatch with the C15 averaged OMC.  
192 Attempts to resolve the plug structure through refinement using lower symmetries  
193 yielded reconstructions of low quality and resolution. Further studies will be required to  
194 resolve the source of the plug although the PulC PDZ domain is a speculative candidate  
195 given the position of the PulC HR domain at the base of the secretin.

196

### 197 **The PulS pilotin decorates the secretin core**

198 Decorating the outside of the secretin core proximal to the PulD S-domain in the map,  
199 globular densities were observed in a position consistent with the pilotin AspS relative



200 to GspD in ETEC<sup>7</sup> (Figure 2). For these densities, map resolution was limited to ~7 Å  
201 (Figure S1) and focused refinements<sup>28</sup> did not markedly improve resolution. A homology  
202 model of the PulS pilotin in complex with the PulD S-domain helix 15 based on the  
203 homologous structure in *Dickeya dadantii* (PDB 4K0U<sup>30</sup>) was fitted as a rigid body (Figure  
204 4C). Compared to AspS<sup>7,31</sup>, the position of PulS differs by a 12° radial rotation around the  
205 secretin long axis (Figure 4B). Loop 38 between S-domain helix 14 and helix 15 bound  
206 to PulS constitutes the lone contact point between the secretin core and PulS (Figure 4C).  
207 No additional contacts were observed in contrast to AspS-GspD where the secretin core  
208 helix  $\alpha$ 11 forms extensive secondary contact with the pilotin<sup>7</sup>. The lack of equivalent  
209 secondary contacts between PulS and PulD likely accounts for the apparent flexibility  
210 between these proteins and may be a distinguishing feature between the structurally  
211 discrete *Klebsiella*-type and *Vibrio*-type pilotins.

212

### 213 **PulC links the OMC to the inner membrane AP**

214 Whilst the PulC HR domain binds to the base of the secretin, its N-terminus is located  
215 within the inner membrane AP<sup>11</sup> so that PulC is predicted to span the periplasm and link  
216 the AP and OMC. To verify the presence and positioning of the PulC N-terminus within  
217 the AP, a hexahistidine tag was inserted after aa 61 where PulC was predicted to exit the  
218 inner membrane and enter the periplasm. Ni-NTA gold labelling showed beads localize  
219 exclusively to the AP and not the OMC (Figure 6A and Figure S4). Given the PulC HR  
220 domains bind to the base of the secretin, PulC therefore spans the periplasmic gap  
221 between the OMC and AP (Figure 1C).

222

### 223 **PulE, PulL and PulM form a flexible hexameric hub**

224 Cryo-EM 2D class averages of the Pul<sub>CDELMNS</sub> complex revealed the ultrastructure of the  
225 AP positioned beneath the OMC. A 20-22 nm outer ring is coupled to a 10-12 nm inner  
226 ring by six radial linkers (Figure 6B). Focused alignments of the AP where the OMC was  
227 masked out show the outer ring to be comprised of weakly associating non-contiguous  
228 globular densities (Figure 6C and Figure S5A). This concentric ring structure is highly  
229 flexible and represents the preferred single orientation of the AP so that 3D structure  
230 determination was impeded. The addition of non-hydrolysable ATP analogues made no  
231 obvious change to the Pul<sub>CDELMNS</sub> complex under conditions tested. In order to dissect the  
232 observed AP ultrastructure, a sub-assembly constituting PulE, PulL, PulM, and PulN  
233 (Pul<sub>ELMN</sub>) was purified by 2-step affinity chromatography. GraFix<sup>32</sup> stabilized the complex  
234 and reduced particle heterogeneity. PulN bound weakly to the complex and only trace  
235 quantities were observed by SDS-PAGE within the Pul<sub>ELMN</sub> complex after GraFix (Figure  
236 S5B). The resultant Pul<sub>ELM</sub> complex was analyzed by cryo and negative stain EM on  
237 continuous carbon film (Figure 6D-E and Figure S5B-C). Under vitreous conditions,  
238 Pul<sub>ELM</sub> yielded a preferred orientation concentric ring structure that was similar to the  
239 AP within the Pul<sub>CDELMNS</sub> complex, with equivalent dimensions and overall C<sub>6</sub> symmetry.  
240 By negative stain, the same ultrastructure was observed although the sample was  
241 compacted so that the outer and inner rings have dimensions of 16-18 nm and 8-9 nm,  
242 respectively. Compaction was likely a consequence of sample flexibility and drying effects  
243 during the negative stain procedure. PulE alone, and PulE in complex with the  
244 cytoplasmic domain of PulL (aa 1-235) or full-length PulL were also purified from the  
245 membrane fraction. However, EM analysis yielded heterogeneous and flexible particles  
246 that did not further resolve AP ultrastructure under conditions tested.

247

248 **Discussion**

## 249 **Model of the inner membrane AP**

250 Negative stain and cryo-EM studies of the Pul<sub>CDELMNS</sub> complex revealed the ultrastructure  
251 of the AP positioned beneath the OMC to be a highly flexible hexameric hub comprising  
252 two concentric rings. In vitreous ice, the inner ring had a diameter of ~11 nm and overall  
253 C<sub>6</sub> symmetry. The outer ring constituted non-contiguous globular densities with ~22 nm  
254 diameter. Similar ultrastructure was observed with purified Pul<sub>ELM</sub> complex meaning just  
255 these components alone are sufficient to generate the bulk of the hexameric hub  
256 structure. In both systems, the single preferred orientation captured was considered to  
257 represent an end view projection of the AP. In the T2SS, the *V. cholerae* Pule homologue  
258 GspE forms a quasi C<sub>6</sub> ring with diameter 11-13 nm when combined with an Hcp1  
259 fusion<sup>14</sup>. The related T4P system is energized by the ATPases PilB and PilT, which are  
260 known to operate as highly dynamic hexameric rings. PilB has dimensions of 13.5 nm and  
261 9 nm when in an elliptical C<sub>2</sub> conformation<sup>15</sup> whilst the PilT ring has a diameter of 11.5  
262 nm<sup>33</sup>. For PilB and GspE these dimensions are specific to the N<sub>2E</sub> and CTE ATPase  
263 domains and do not include their N-terminal N<sub>1E</sub> domains. In situ reconstruction of the  
264 T4P system in *Myxococcus xanthus* indicates the position of PilB and PilT to be located  
265 centrally at the base of the AP<sup>34</sup>. Collectively, this data is consistent with a model for the  
266 Pul<sub>CDELMNS</sub> AP and Pul<sub>ELM</sub> complex in which the observed inner ring constitutes a Pule  
267 hexamer comprising the N<sub>2E</sub> and CTE domains similar to that observed in *V. cholerae*  
268 GspE<sup>14</sup> (Figure 6F).

269 The *V. cholerae* GspE N<sub>1E</sub> domain forms a direct 1:1 stoichiometric complex with  
270 the cytoplasmic domain of GspL<sup>17,18</sup>. The equivalent domains in *K. pneumoniae* also form  
271 a 1:1 stoichiometric complex termed here Pul<sub>E-N<sub>1E</sub>/L<sub>cyto</sub></sub> (Figure S5D). In the T4P system,  
272 the Pul<sub>L<sub>cyto</sub></sub> homologue PilM forms a ring around the central PilB/PilT hexamer. This  
273 architecture supports a model for the Pul<sub>CDELMNS</sub> AP and Pul<sub>ELM</sub> complex where the bulk

274 of the hexameric hub outer ring constitutes Pul<sub>E-N1E/Lcyto</sub> complexes (Figure 6F). PulM, the  
275 periplasmic domain of Pull (termed Pull<sub>peri</sub>), and PulN and PulC when present, may also  
276 contribute to the observed outer ring densities if ordered. Certainly Pull<sub>peri</sub>, PulM and  
277 PulN do not form a periplasmic ring here as might be expected based on the T4P system<sup>34</sup>.  
278 The retention of membrane or inclusion of other T2SS components such as the pseudo-  
279 pilus may be required for the stabilization and visualization of any such ring.

280 Within the Pul<sub>CDELMNS</sub> complex, the mean relative ratio of PulC:PulE:  
281 Pull:PulM:PulN was measured to be 2.13:1.00:0.97:0.99:0.95 indicating two copies of  
282 PulC for each of the AP components. The globular densities that comprise the outer ring  
283 of the hexameric hub do not form a contiguous well-ordered structure. This observation  
284 combined with the stoichiometry supports a modular architecture where independent or  
285 weakly associated sub-complexes containing two copies of PulC and a single copy of  
286 PulM, PulN, and Pul<sub>E-N1E</sub> in complex with Pull decorate each subunit of the central PulE  
287 hexamer (Figure 6G). This model does not preclude the possible formation of a Pul<sub>E-</sub>  
288 <sub>N1E/Lcyto</sub> ring positioned more centrally directly above the PulE N2E/CTE hexamer *in vivo*.  
289 Such an arrangement would be similar to that observed for the N1 domains of *Thermus*  
290 *thermophilus* PilF<sup>35</sup> and may promote the close contact and encircling of the putative pilin  
291 spooling protein PulF<sup>13,19</sup>.

292

### 293 **PulC mechanism for overcoming AP-OMC symmetry mismatch**

294 PulC spans the periplasm to bind the OMC with the PulC N-terminus located within the  
295 inner membrane and the HR domain bound to the PulD N0 domain at the secretin base.  
296 Based on six PulE subunits within the AP, stoichiometry measurements support a model  
297 where the PulC copy number within the AP is 12. PulC therefore constitutes a cage that  
298 spans the periplasm (Figure 6G) and is reminiscent of the virB10 N-terminus which spans

299 the periplasm in the type IV secretion system<sup>36</sup>. Substrate may have the potential to gain  
300 access to the secretin lumen via Pull and PulM<sup>37</sup> in positions where PulC is absent. The  
301 OMC structure shows that each PulC HR domain binds a single PulD N0 domain  
302 independently with no lateral contacts between neighbouring HR domains. This is  
303 important as it provides a natural mechanism for overcoming symmetry mismatch  
304 between the 12 PulC subunits located within the hexameric AP and the 15-fold symmetric  
305 OMC. In this model on average three secretin N0 domains remain unoccupied without  
306 bound PulC HR domain. Whether full secretin N0 domain binding occupancy occurs with  
307 up to 15 bound PulC HR domains cannot be entirely excluded as each of the N0 domains  
308 has at least the potential to bind a PulC HR domain. T2SS assembly and secretion may  
309 ultimately occur in a dynamic equilibrium with a range of N0 domain binding  
310 occupancies.

311

### 312 **The secretin N0-N1 domains form a compact C15 ring**

313 Multiple T2SS secretin structures have been solved including *Klebsiella*-types from *E. coli*  
314 K12<sup>10</sup> and *Pseudomonas aeruginosa*<sup>9</sup>, and *Vibrio*-types from enterotoxigenic *E. coli*  
315 (ETEC)<sup>7</sup>, enteropathogenic *E. coli* (EPEC)<sup>8</sup> and *V. cholerae*<sup>10</sup>. Despite high quality 3-3.5 Å  
316 resolutions achieved for the secretin core and N3 domains, all the structures have poorly  
317 resolved densities towards the PulD/GspD N-termini with homology modelling required  
318 for the N1 domains and entirely absent N0 domains. Docking of N0 and N1 domain co-  
319 crystal structures<sup>22,25-27</sup> into the secretin maps failed to resolve the possible position and  
320 orientation of the N0 domain due to significant steric clashes. Consequently, the PulC HR  
321 domain orientation relative to the N0 domain remained unclear and it was modelled  
322 decorating the inside of the secretin base<sup>22</sup>. To account for the high flexibility of the  
323 secretin N0 and N1 domains and the symmetry mismatch between the 6-fold symmetric

324 AP and 15-fold OMC, a pseudo-6-fold arrangement comprising a hexamer of dimers had  
325 been proposed for the N0-N2 domains<sup>9</sup>. In such a model the N0-N2 domains of three  
326 secretin subunits would be displaced in a metastable arrangement. The OMC structure  
327 derived from the Pul<sub>CDELMNS</sub> complex resolves now how the PulD N0 domains are  
328 organized within the secretin relative to the N1 domain ring. The N-terminus of loop 7  
329 wedges and stabilizes neighbouring N1 domains whilst the N0 domains form an intimate  
330 and stable C15 ring. At least when PulC HR domain is bound, the N0 ring does not  
331 immediately support a model where the secretin incorporates multiple symmetries along  
332 its length. Instead the secretin forms a well-ordered barrel, which combined with the  
333 PulC HR domains bound at the base protrudes from the outer membrane ~20 nm into the  
334 periplasm.

335

### 336 **Concluding remarks**

337 In this study, the T2SS outer membrane components PulD and PulS are co-purified with  
338 the core components of the inner membrane AP including PulC, PulE, PulL, PulM and  
339 PulN. Overall, our results reveal a glimpse at the core architecture of an assembled T2SS  
340 (Figure 6G) and show it to be different to other known secretion systems (Figure S6). The  
341 T2SS AP does not constitute a stack of conjoined rings that seal directly to the secretin  
342 base forming an enclosed central channel as observed in the T3SS<sup>38</sup>. Instead, the T2SS  
343 has a highly dynamic and modular architecture where the OMC and inner membrane AP  
344 have weakly associating and limited inter-connection via a PulC cage. This observation is  
345 consistent with the requirement for substrate to gain access to the secretin lumen via the  
346 periplasm. Whilst the resolution of the hexameric hub observed in the Pul<sub>CDELMNS</sub> and  
347 Pul<sub>ELM</sub> complexes is limited it shows the T2SS to have a six-fold arrangement for  
348 assembled AP components. The observed AP architecture is consistent with that

349 described in the T4P system<sup>34</sup> providing evidence that the inner membrane  
350 ultrastructure is broadly conserved between these different but related secretion  
351 systems. Although the connection between inner and outer membrane complexes was  
352 expected to be transient and dynamic<sup>3</sup>, we show that it is possible to isolate an almost  
353 fully assembled T2SS *in vitro*. Our work suggests that the purification of an entire T2SS  
354 with the pseudo-pilus, PulF, and ultimately substrate incorporated is in reach. These  
355 additional components may be necessary to help stabilize the inner membrane AP so that  
356 ultimately full structural dissection and mechanistic understanding for the T2SS may be  
357 achieved.

358

### 359 **Acknowledgements**

360 We thank eBIC for cryo-EM data collection support particularly Kyle Dent and Yuriy  
361 Chaban. Tillmann Pape and Paul Simpson for in-house EM support. Francesca Gubellini  
362 for gold labelling advice. Arjen Jakobi and Carsten Sachse for LocScale support. This work  
363 was funded by a Wellcome Trust Career Development Fellowship Enhancement Award  
364 (200074/Z/15/Z) to H.L.

365

### 366 **Author Contributions**

367 A.C and H.L designed experiments. H.L initially cloned and purified the Pul<sub>CDELMNS</sub>  
368 complex. A.C and H.L cloned and purified proteins, collected and processed data, and  
369 solved structure. A.C built the OMC structure. A.C and H.L. determined stoichiometry. A.C.  
370 undertook gold labelling. H.L wrote the paper with contributions from A.C.

371

### 372 **Competing interests**

373 The authors declare no competing interests.

374

## 375 **Data availability**

376 3D cryo-EM density maps produced in this study have been deposited in the Electron  
377 Microscopy Data Bank with accession code EMD-0193. Atomic coordinates have been  
378 deposited in the Protein Data Bank (PDB) under accession code 6HCG.

379

## 380 **References**

- 381 1. Cianciotto, N. P. & White, R. C. Expanding role of type II secretion in bacterial  
382 pathogenesis and beyond. *Infect Immun* **85**, e00014-17 (2017).
- 383 2. Nivaskumar, M. & Francetic, O. Type II secretion system: a magic beanstalk or a  
384 protein escalator. *Biochim Biophys Acta* **1843**, 1568-1577 (2014).
- 385 3. Korotkov, K. V., Sandkvist, M. & Hol, W. G. The type II secretion system: biogenesis,  
386 molecular architecture and mechanism. *Nat Rev Microbiol* **10**, 336-351 (2012).
- 387 4. McLaughlin, L. S., Haft, R. J. F. & Forest, K. T. Structural insights into the Type II  
388 secretion nanomachine. *Curr Opin Struc Biol* **22**, 208-216 (2012).
- 389 5. Guilvout, I., Chami, M., Engel, A., Pugsley, A. P. & Bayan, N. Bacterial outer  
390 membrane secretin PulD assembles and inserts into the inner membrane in the  
391 absence of its pilotin. *Embo J* **25**, 5241-5249 (2006).
- 392 6. Daefler, S., Guilvout, I., Hardie, K. R., Pugsley, A. P. & Russel, M. The C-terminal  
393 domain of the secretin PulD contains the binding site for its cognate chaperone,  
394 PulS, and confers PulS dependence on pIVf1 function. *Mol Microbiol* **24**, 465-475  
395 (1997).
- 396 7. Yin, M., Yan, Z. F. & Li, X. M. Structural insight into the assembly of the type II  
397 secretion system pilotin-secretin complex from enterotoxigenic *Escherichia coli*.  
398 *Nat Microbiol* **3**, 581-587 (2018).
- 399 8. Hay, I. D., Belousoff, M. J., Dunstan, R. A., Bamert, R. S. & Lithgow, T. Structure and  
400 membrane topography of the *Vibrio*-type secretin complex from the type 2  
401 secretion system of enteropathogenic *Escherichia coli*. *Journal of Bacteriology* **200**,  
402 00521-17 (2018).
- 403 9. Hay, I. D., Belousoff, M. J. & Lithgow, T. Structural basis of type 2 secretion system  
404 engagement between the inner and outer bacterial membranes. *Mbio* **8**, 01344-17  
405 (2017).
- 406 10. Yan, Z. F., Yin, M., Xu, D. D., Zhu, Y. Q. & Li, X. M. Structural insights into the secretin  
407 translocation channel in the type II secretion system. *Nat Struct Mol Biol* **24**, 177-  
408 183 (2017).
- 409 11. Lallemand, M. *et al.* Dynamic interplay between the periplasmic and  
410 transmembrane domains of GspL and GspM in the type II secretion system. *Plos*  
411 *One* **8**, e79562 (2013).
- 412 12. Abendroth, J. *et al.* The three-dimensional structure of the cytoplasmic domains of  
413 EpsF from the type 2 secretion system of *Vibrio cholerae*. *J Struct Biol* **166**, 303-  
414 315 (2009).



- 415 13 Py, B., Loiseau, L. & Barras, F. An inner membrane platform in the type II secretion  
416 machinery of Gram-negative bacteria. *Embo Rep* **2**, 244-248 (2001).
- 417 14 Lu, C. *et al.* Hexamers of the type II secretion atpase gspe from *Vibrio cholerae* with  
418 increased atpase activity. *Structure* **21**, 1707-1717 (2013).
- 419 15 Mancl, J. M., Black, W. P., Robinson, H., Yang, Z. M. & Schubot, F. D. Crystal Structure  
420 of a Type IV Pilus Assembly ATPase: Insights into the Molecular Mechanism of PilB  
421 from *Thermus thermophilus*. *Structure* **24**, 1886-1897,  
422 doi:10.1016/j.str.2016.08.010 (2016).
- 423 16 Satyshur, K. A. *et al.* Crystal structures of the pilus retraction motor PilT suggest  
424 large domain movements and subunit cooperation drive motility. *Structure* **15**,  
425 363-376, doi:10.1016/j.str.2007.01.018 (2007).
- 426 17 Lu, C., Korotkov, K. V. & Hol, W. G. J. Crystal structure of the full-length ATPase  
427 GspE from the *Vibrio vulnificus* type II secretion system in complex with the  
428 cytoplasmic domain of GspL. *J Struct Biol* **187**, 223-235 (2014).
- 429 18 Abendroth, J., Murphy, P., Sandkvist, M., Bagdasarian, M. & Holl, W. G. J. The X-ray  
430 structure of the type II secretion system complex formed by the N-terminal  
431 domain of EpsE and the cytoplasmic domain of EpsL of *Vibrio cholerae*. *J Mol Biol*  
432 **348**, 845-855 (2005).
- 433 19 Arts, J. *et al.* Interaction domains in the *Pseudomonas aeruginosa* type II secretory  
434 apparatus component XcpS (GspF). *Microbiology* **153**, 1582-1592 (2007).
- 435 20 Lopez-Castilla, A. *et al.* Structure of the calcium-dependent type 2 secretion  
436 pseudopilus. *Nat Microbiol* **2**, 1686-1695 (2017).
- 437 21 Sandkvist, M. Biology of type II secretion. *Mol Microbiol* **40**, 271-283 (2001).
- 438 22. Korotkov, K. V. *et al.* Structural and functional studies on the interaction of GspC  
439 and GspD in the type II secretion system. *Plos Pathogens* **7**, e1002228 (2011).
- 440 23. Butt, R.H. & Coorssen, J.R. Coomassie Blue as a near-infrared fluorescent stain: A  
441 systematic comparison with Sypro Ruby for in-gel protein detection. *Molecular &*  
442 *Cellular Proteomics* **12**, 3834-3850 (2013).
- 443 24. Luo, S., Wehr, N.B. & Levine, R.L. Quantitation of protein on gels and blots by  
444 infrared fluorescence of Coomassie blue and Fast Green. *Anal Biochem* **350**, 233-  
445 8 (2006).
- 446 25. Korotkov, K.V., Pardon, E., Steyaert, J. & Hol, W.G.J. Crystal structure of the N-  
447 terminal domain of the secretin GspD from ETEC determined with the assistance  
448 of a nanobody. *Structure* **17**, 255-265 (2009).
- 449 26. Van der Meeren, R. *et al.* New insights into the assembly of bacterial secretins:  
450 structural studies of the periplasmic domain of XcpQ from *Pseudomonas*  
451 *aeruginosa*. *J Biol Chem* **288**, 1214-1225 (2013).
- 452 27. Douzi, B. *et al.* Unraveling the self-assembly of the *Pseudomonas aeruginosa* XcpQ  
453 secretin periplasmic domain provides new molecular insights into type II  
454 secretion system secretion architecture and dynamics. *Mbio* **8**, e01185-17 (2017).
- 455 28. Scheres, S. H. Processing of structurally heterogeneous cryo-EM data in RELION.  
456 *Methods Enzymol* **579**, 125-157 (2016).
- 457 29. Wang, X. H. *et al.* Cysteine scanning mutagenesis and disulfide mapping analysis of  
458 arrangement of GspC and GspD protomers within the type 2 secretion system. *J*  
459 *Biol Chem* **287**, 19082-19093 (2012).
- 460 30. Rehman, S., Gu, S., Shevchik, V. E. & Pickersgill, R. W. Anatomy of secretin binding  
461 to the *Dickeya dadantii* type II secretion system pilotin. *Acta Crystallogr D Biol*  
462 *Crystallogr* **69**, 1381-1386 (2013).

- 463 31. Dunstan, R. A. *et al.* Assembly of the type II secretion system such as found in *Vibrio*  
464 *cholerae* depends on the novel pilotin AspS. *Plos Pathog* **9**, e1003117 (2013).
- 465 32. Kastner, B. *et al.* GraFix: sample preparation for single-particle electron  
466 cryomicroscopy. *Nat Methods* **5**, 53-55 (2008).
- 467 33. Mistic, A. M., Satyshur, K. A. & Forest, K. T. *P. aeruginosa* PilT structures with and  
468 without nucleotide reveal a dynamic type IV pilus retraction motor. *J Mol Biol* **400**,  
469 1011-1021 (2010).
- 470 34. Chang, Y. W. *et al.* Architecture of the type IVa pilus machine. *Science* **351**, aad2001  
471 (2016).
- 472 35. Collins, R. *et al.* Structural cycle of the *Thermus thermophilus* PilF ATPase: the  
473 powering of type IVa pilus assembly. *Sci Rep* **8**, 14022 (2018).
- 474 36. Low, H.H. *et al.* Structure of a type IV secretion system. *Nature* **508**, 550-553  
475 (2014).
- 476 37. Michel-Souzy, S. *et al.* Direct interactions between the secreted effector and the  
477 T2SS components GspL and GspM reveal a new effector-sensing step during type  
478 2 secretion. *J Biol Chem* **293**, 19441-19450 (2018).
- 479 38. Worrall, L.J. *et al.* Near-atomic-resolution cryo-EM analysis of the *Salmonella* T3S  
480 injectisome basal body. *Nature* **540**, 597-601 (2016).
- 481 39. Jakobi, A.J., Wilmanns, M. & Sachse, C. Model-based local density sharpening of  
482 cryo-EM maps. *Elife* **6**, e27131 (2017).
- 483 40. Kucukelbir, A., Sigworth, F.J. & Tagare, H.D. Quantifying the local resolution of  
484 cryo-EM density maps. *Nat Methods* **11**, 63-5 (2014).
- 485 41. Wang, Z. *et al.* An allosteric transport mechanism for the AcrAB-TolC multidrug  
486 efflux pump. *Elife* **6**, e24905 (2017).

487  
488  
489  
490

491

492

493

494

495

496

497

498

499

500

## 501 Figures

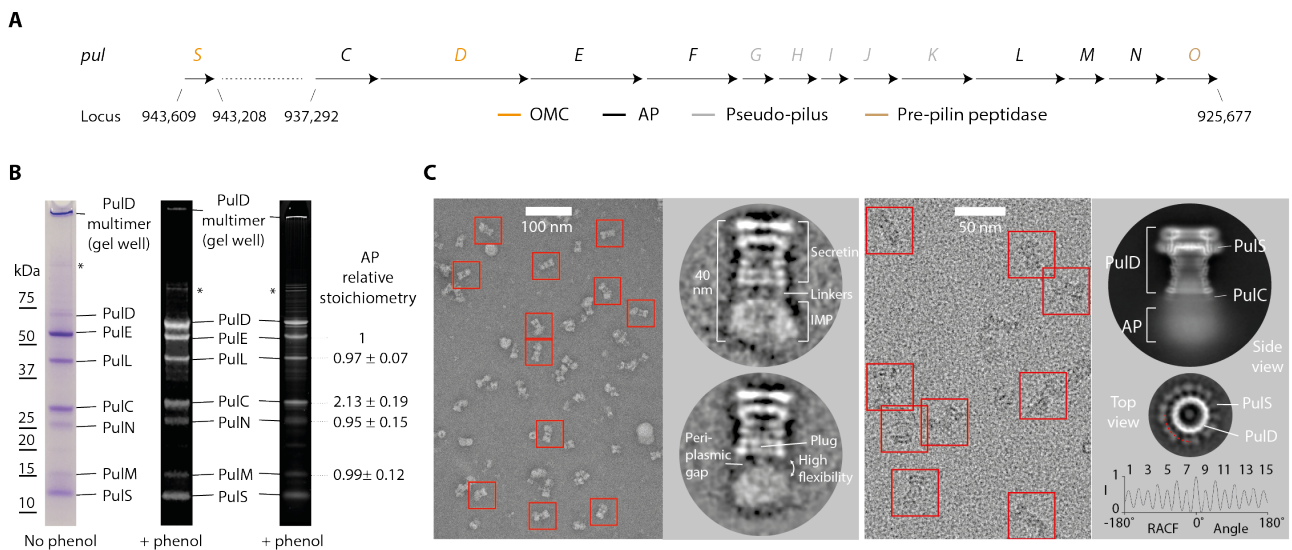

502

### 503 Figure 1. Purification, stoichiometry and EM analysis of the Pul<sub>CDELMNS</sub> complex. (A)

504 Schematic showing the chromosomal location and gene arrangement for the *Klebsiella*

505 *pneumoniae* T2SS. OMC - outer membrane complex, AP - assembly platform. (B) Typical SDS-

506 PAGE analysis of the Pul<sub>CDELMNS</sub> complex. (Left) Coomassie R250 stained gel without phenol

507 treatment. (Middle) Fluorescent emission Coomassie R250 stained gel imaged at 680 nm with

508 phenol extraction. Residual PulD remains in the gel well. (Right) Fluorescent emission Sypro

509 Ruby stained gel imaged at 302 nm with phenol extraction. Relative mean stoichiometry and

510 standard deviation for all assembly platform (AP) components are indicated. Stoichiometry

511 measurements were determined from six independent purifications. \* indicates PulD

512 multimer. (C) Left panel shows typical negative stain EM micrograph of the Pul<sub>CDELMNS</sub>

513 complex with selected individual particles highlighted with a red box. Zoomed images of 2D

514 class averages are also shown. Right panel shows typical cryo-EM micrograph of the Pul<sub>CDELMNS</sub>

515 complex with associated side view 2D class average. Top view 2D class average shows PulS

516 and PulD with C15 symmetry based on the RACF. Red dotted line indicates radial ring for RACF

517 calculation.

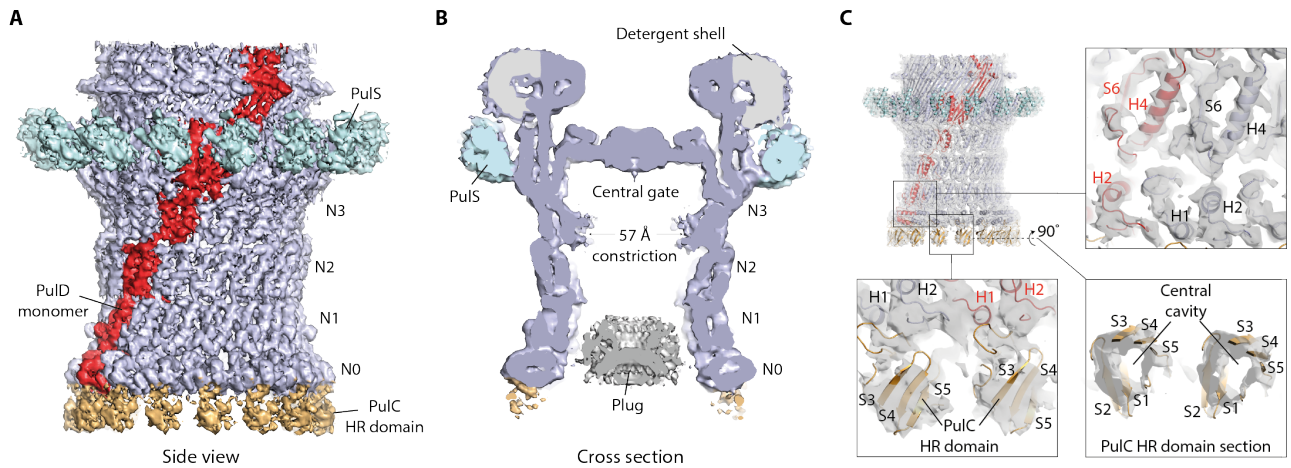

518

519

520 **Figure 2. Cryo-EM density map of the outer membrane complex (OMC).** (A) 4.3 Å

521 resolution C15 symmetrized cryo-EM map of the OMC locally sharpened with LocScale<sup>39</sup> and

522 contoured at 5.5 $\sigma$ . (B) Cross section view of the OMC revealing internal features of the PulD

523 secretin. A plug occludes the secretin lumen. The map was unsharpened and contoured at 3 $\sigma$ .

524 (C) Fit of molecular models within the OMC map. *De novo* model for the PulD secretin including

525 the N1 and N0 domains (top right). A PulC HR domain homology model was rigid body fitted.

526 The map was sharpened with LocScale and contoured at 4 $\sigma$  (bottom left). In this localized

527 region of the map at 7-8 Å resolution, the central cavity of the PulC HR domain was clearly

528 resolved (bottom right).

529

530

531

532

533

534

535

536

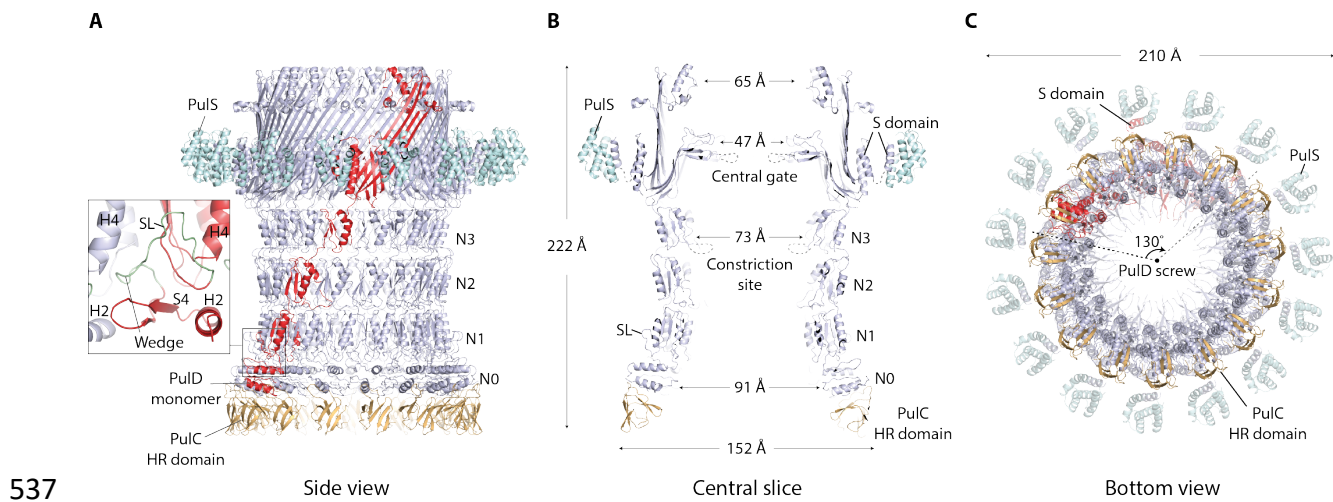

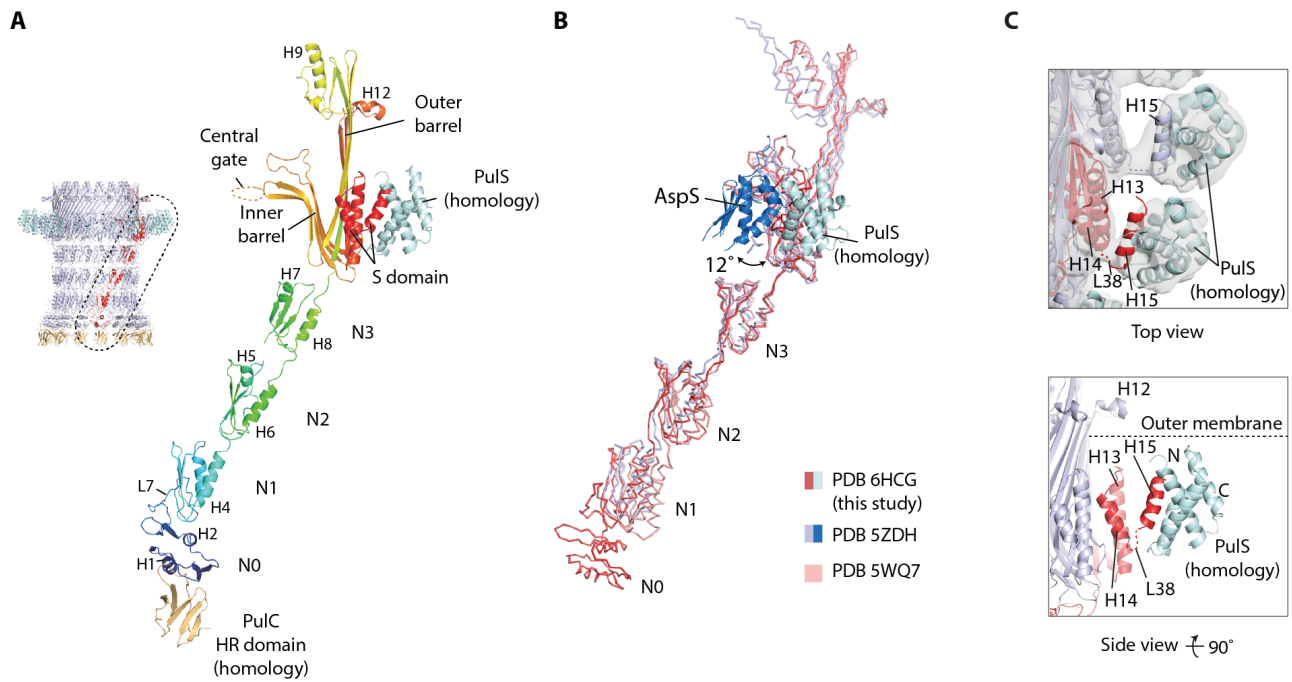

556

557

558 **Figure 4. Structural comparison of PulD and PulS models. (A)** A complex of PulD, PulS and

559 PulC HR domain monomers extracted from the C15 OMC model (dotted region). For PulD,

560 rainbow coloring highlights blue N-terminus through to red C-terminus. **(B)** Superposition of

561 the PulD and PulS complex with the equivalent from enterotoxigenic *E. coli* PDB 5ZDH and *E.*

562 *coli* K12 PDB 5WQ7. Compared to PulD, these PDBs differ by RMSD  $C\alpha = 3.3 \text{ \AA}$  and  $3.2 \text{ \AA}$ ,

563 respectively. The relative position of AspS in PDB 5ZDH differs to PulS by a  $12^\circ$  azimuthal

564 rotation around the secretin long axis. **(C)** (Top) Fit of PulS homology model with the OMC

565 map. The map was low pass filtered to  $8 \text{ \AA}$  and contoured at  $5\sigma$  before rigid body fitting.

566 (Bottom) Cartoon schematic showing the PulS model relative to the PulD S-domain (red

567 helices). PulD helix 15 locates to a groove within PulS<sup>30</sup>. Flexible loop 38 represents the only

568 attachment between the helix 15/PulS complex and the rest of the PulD monomer.

569

570

571

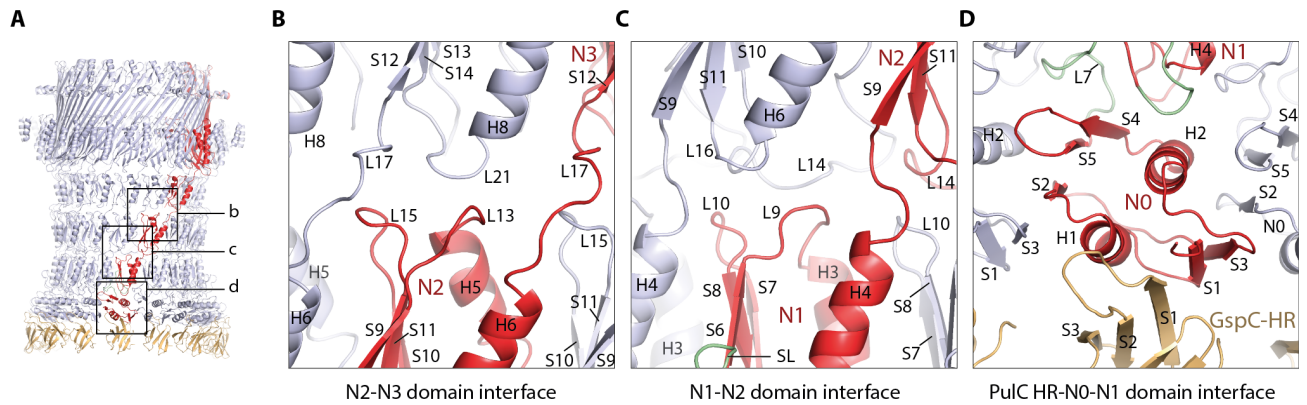

572

573

574 **Figure 5. Structural analysis of the outer membrane complex (OMC) periplasmic**

575 **domains. (A)** Overview model of the OMC with PulS removed for clarity. Boxed regions are

576 zoomed in **B-D. (B-D)** Cartoon representation of selected domain interfaces showing key

577 structural details.

578

579

580

581

582

583

584

585

586

587

588

589

590

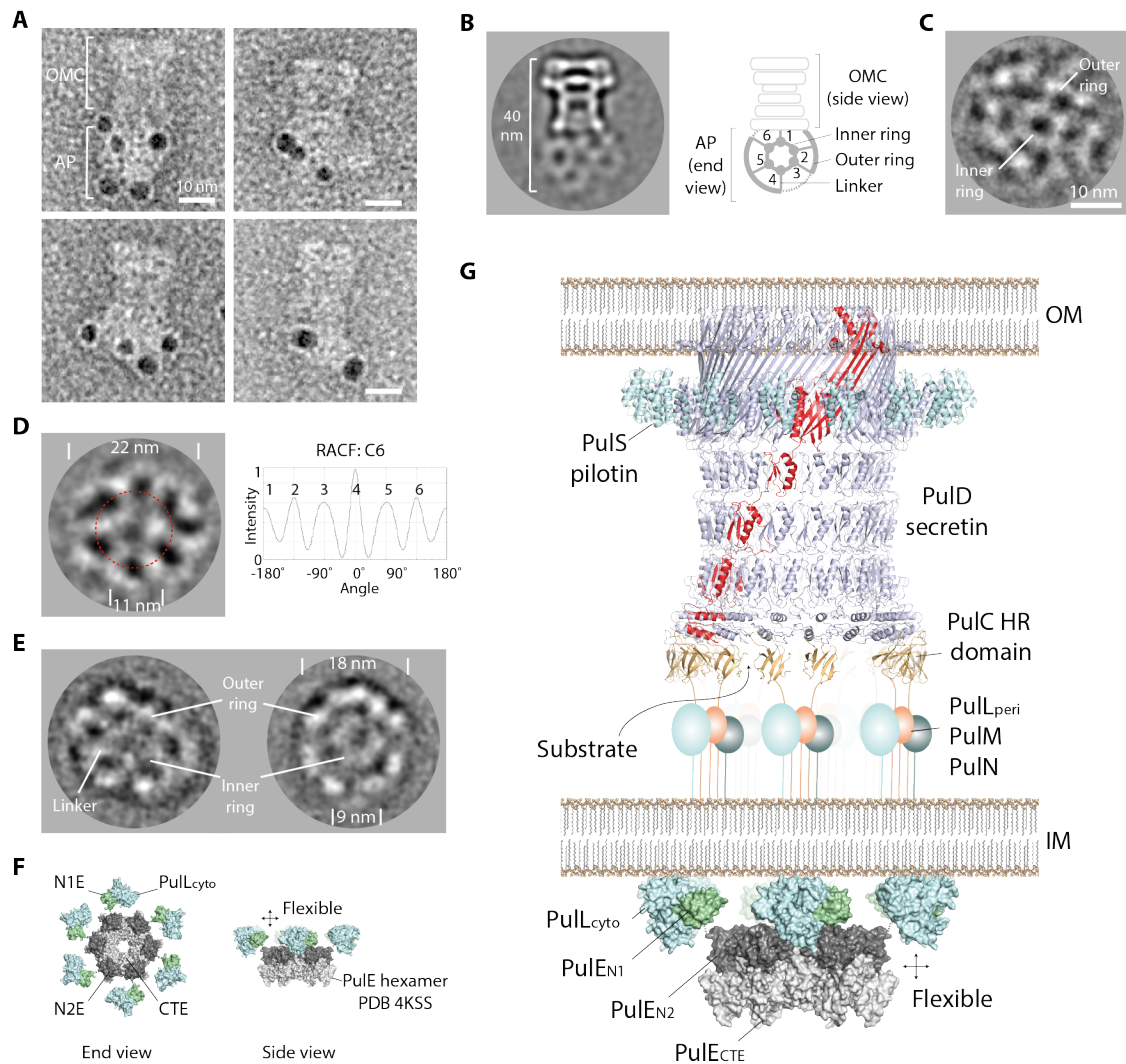

591

592 **Figure 6. 2D EM of the assembly platform (AP) and a T2SS core model. (A)** Ni-NTA gold  
 593 bead labelling of the PulC N-terminus. Beads locate exclusively to the AP. **(B)** Cryo-EM 2D class  
 594 average of Pul<sub>CDELMNS</sub>. The AP showed end views as a preferred orientation with C6 symmetry.  
 595 **(C)** Cryo-EM 2D class average of Pul<sub>CDELMNS</sub> with the alignment and classification focused on  
 596 the AP. **(D)** Cryo-EM 2D class average of Pul<sub>ELM</sub> showing C6 symmetry. RACF = rotation auto-  
 597 correlation function calculated around dotted red radial ring. **(E)** Negative stain EM 2D class  
 598 average of Pul<sub>ELM</sub>. **(F)** Schematic showing modelled arrangement of the Pul<sub>EL</sub> cytoplasmic  
 599 domains within the Pul<sub>CDELMNS</sub> and Pul<sub>ELM</sub> hexameric hub. The central PuE hexamer (inner  
 600 ring, PDB 4KSS) is decorated by six copies of the PuE-N1E/L<sub>cyto</sub> complex (outer ring, PDB 2BH1).  
 601 Connection between inner and outer ring is mediated by the 44 aa flexible N1E-N2E inter-



602 domain linker. **(G)** Stoichiometric model of an assembled T2SS core apparatus. AP  
603 components comprise a hexameric hub. PulC connects the AP to the OMC by binding to the  
604 secretin base. Substrate may be loaded through the PulC cage in positions where GspC is  
605 absent.

606

607

608

609

610

611

612

613

614

615

616

617

618

619

620

621

622

623

624

625

626

## 627 Supplementary Figures

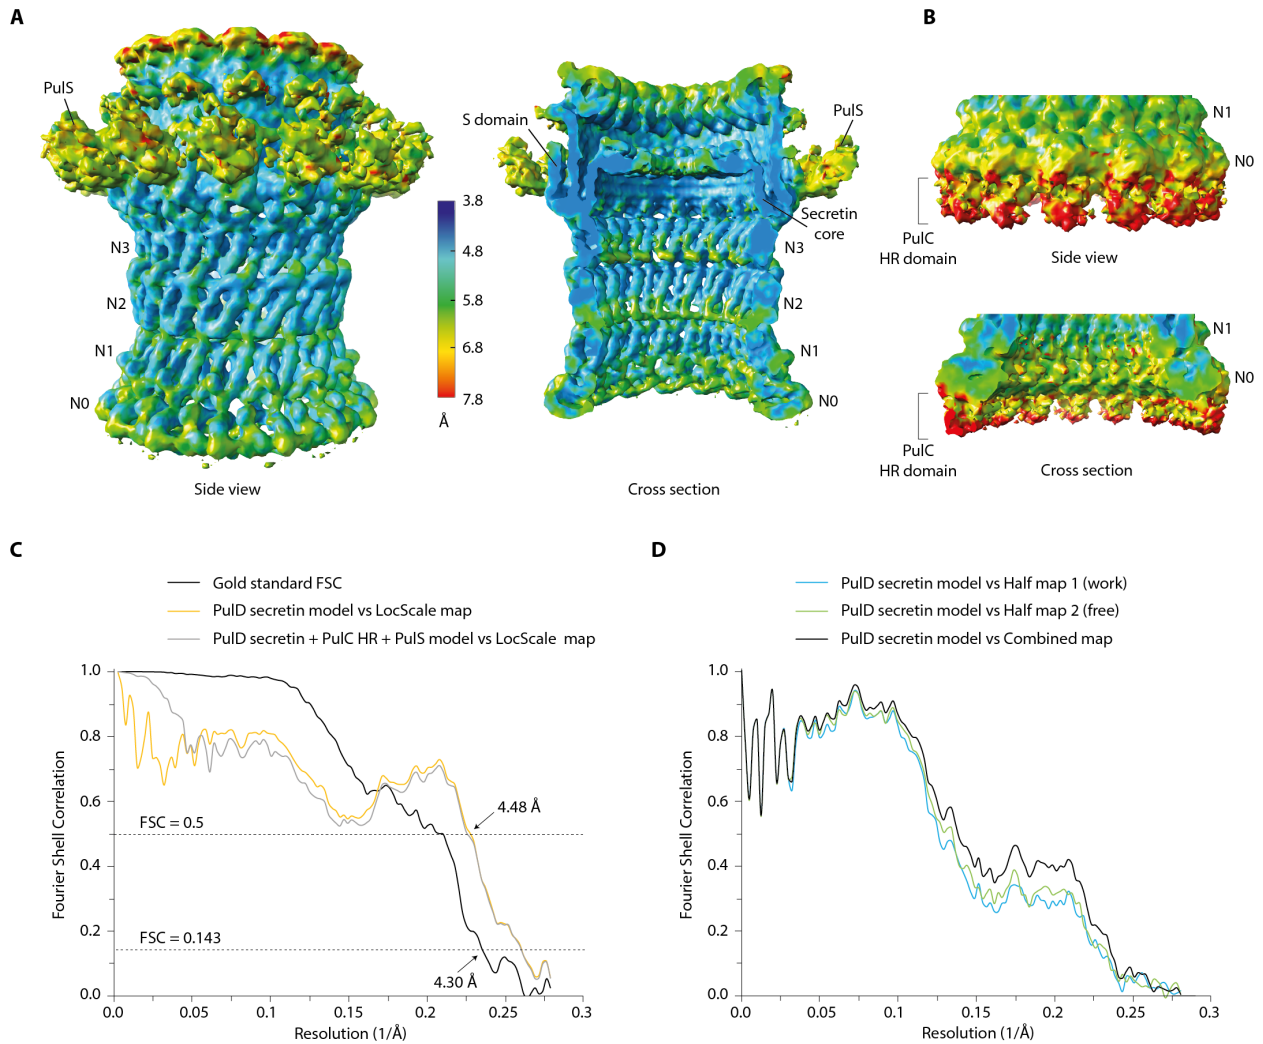

628

629 **Figure S1. Outer membrane complex (OMC) local resolution map and FSC curves. (A)**

630 Unsharpened OMC map showing local resolution estimates calculated using ResMap<sup>40</sup> and

631 contoured at  $4.5\sigma$ . **(B)** Equivalent to **A** but contoured at  $2\sigma$  so as to view the PulC HR domain

632 densities at the secretin base. **(C)** Gold standard FSC curve of the OMC (black). FSC curves

633 between the PulD secretin model and the LocScale<sup>39</sup> sharpened map (orange). FSC curves

634 between the PulD secretin model with homology models of PulS and PulC HR domain fitted,

635 and the LocScale sharpened map (grey). **(D)** Cross-validation for the PulD secretin model.

636 PulD secretin model versus half map 1 (work- light blue), half map 2 (free- green), and

637 combined (black). See Methods for further detail.

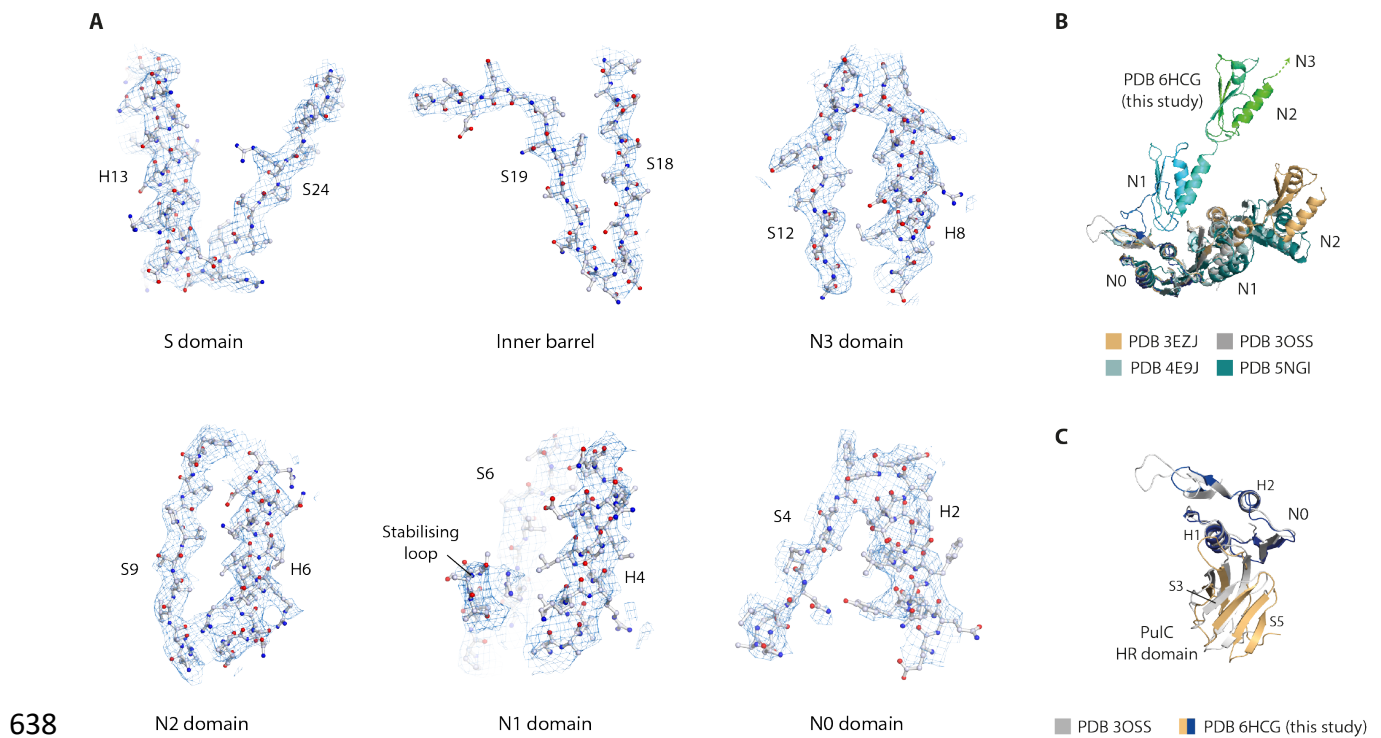

638

639

640 **Figure S2. Map quality and PulS fit. (A)** Selected regions of the OMC EM density map

641 showing PulD secretin side chain detail and build. The map was sharpened with B factor = -

642 142 Å<sup>2</sup> and contoured between 5-8σ. **(B)** Superposition of PulD N0, N1 and N2 domains with

643 equivalent domains derived from various crystal structures including enterotoxigenic *E. coli* PDB

644 3EZJ and PDB 3OSS and *P. aeruginosa* PDB 4E9J and PDB 5NGI. **(C)** Superposition of PulD N0

645 domain in complex with PulC HR domain against the equivalent domains in the enterotoxigenic *E.*

646 *coli* crystal structure PDB 3OSS. The complexes differ by RMSD Cα = 1.4 Å.

647

648

649

650

651

652

653

|           |                                                                       |     |
|-----------|-----------------------------------------------------------------------|-----|
| PA        | -MSQPLLRALFAPSS-----RSYVPAVLLSLALGIQAAHAENSGGNAFVPAGNQEAHW            | 53  |
| EC_K12    | -----MKGLNKIT-----CCL--LA-----ALLMPCAGHAENEQY                         | 28  |
| KP        | -----MKSLRKML-----PALLILT-----PLL--FSPAAAEFF                          | 27  |
| KO        | -----MIIANVIRPFS-----LMLLVFA-----ALL--FKPAAAEFF                       | 30  |
| EC_H10407 | MFWRDITLSVWRKKTGLKTKKRLLPLVLA-----AALCSPVWAEATF                       | 45  |
| VC        | -----MKYWLKSSW-----LLA-----GSLLSTP-LAMANEF                            | 27  |
|           | :                                                                     | :   |
|           |                                                                       |     |
| PA        | TINLKDADIREFIDQISEITGETFVVDPRVKGVSVVSKAQLSLSEVYQLFLSVMSTHGF           | 113 |
| EC_K12    | GANFNADIRQFVEIVGQHLGKTIILIDPSVQGTISVRSNDTFSQQEYQFFLSILDLYGY           | 88  |
| KP        | SASFKGTDIQEFINTVSKNLNKTVIIDPSVRGTITVRSYDMLNEEQYYQFFLSVLDVYGF          | 87  |
| KO        | SASFKGTDIQEFINTVSKNLNKTVIIDPSVRGTITVRSYDMLNEEQYYQFFLSVLDVYGF          | 90  |
| EC_H10407 | TANFKDIDLKSFIVGANLNKTIIMGPGVQGVKSIRTMTPLNERQYYQLFLNLLEAQGY            | 105 |
| VC        | SASFKGTDIQEFINIVGRNLEKTIIVDPSVRGKVDVRSFDTLNEEQYYFFLSVLEVYGF           | 87  |
|           | . . . . . : : : : : . . . . . * : : : : : * : : : : : * : : : : : *   |     |
|           |                                                                       |     |
| PA        | TVVAQGDQ-ARIVPNAEAKTEA-----GGGQSAPDRLETRVIQVQSPVSELIPLIRPL            | 166 |
| EC_K12    | SVITLDNGFLKVVRSANVKTSPGMIAD-SSRPGVGDDELVTRIVPLENVPARDLAPLLRQM         | 147 |
| KP        | AVINMNVGLKVVRAKDAKTSAPVVAS-AAAPGEGDEVVTRVPLTNVAARDLAPLLRQL            | 146 |
| KO        | AVINMNVGLKVVRSKDAKTAAPVAS-DAAPGIGDEVVTRVPLTNVAARDLAPLLRQL             | 149 |
| EC_H10407 | AVVPMENDVLKVVKSSAAKVEPLPLVGEESDNYAGDEMVTKVVPRVNSVRELAPILRQM           | 165 |
| VC        | AVVEMDNGVLKVIKSKDAKTAIPVLS-GEERANGDEVITQVVAVKNVSVRELSPLLRQL           | 146 |
|           | : * : : : : * . . . . . * . : * : : : : : . : * * : : : *             |     |
|           |                                                                       |     |
| PA        | VPQYG--HLAAVPSANALIISDRSANIARIEDVIRQLDQKGSVDYSVINLRYGWMDAAE           | 224 |
| EC_K12    | MDAGSVGNVVHYEPSNVLILTGRASTINKLIEVIKRVDIVGTEKQIIHLEYASAEDLAE           | 207 |
| KP        | NDNAGAGSVVHYEPSNVLMTGRAAVIKRLLTIVERVDNAGDRSVVTVPLSWASAAEVVK           | 206 |
| KO        | NDNAGAGSVVHYEPSNVLMTGRAAVIKRLLTIVERVDNAGDRSVVTVPLAWASAADVVK           | 209 |
| EC_H10407 | IDSAGSNVVNYDPSNVIMLTGRASVVERLTEVIQRVDHAGNRTEEVIPLDNASAEIAR            | 225 |
| VC        | IDNAGAGNVVHYDPANIILITGRAAVNRLAEIIRRVDAQGKEIEVVELNNSAAEMVR             | 206 |
|           | . . . . . * : : : : . : : : : * . . . . . * . . . . .                 |     |
|           |                                                                       |     |
| PA        | VLNNAMS----RGQAKGAAGAQVIADARTNRLIILGPPQARAKLVQLAQLDPTARSAN            | 280 |
| EC_K12    | ILNQLISESHGKSQMPALLSAKIVADKRTNSLIISGPEKARQRITSLKSLDVEESEEGN           | 267 |
| KP        | LVTTELN-KDTSKALPGSMVANVADERTNAVLVSGEPNSRQRIIAMIKQLDRQAVQGN            | 265 |
| KO        | LVTTELN-KDTSKALPGSMVANVADERTNAVLVSGEPNSRQRIIAMIKQLDRQATQGN            | 268 |
| EC_H10407 | VLESLT-KNS-GENQPATLKSQIVADERTNSIVSGDPATRDKMRRLIRRLDSEMERSGN           | 283 |
| VC        | IVEALN-KTTDAQNTPEFLKPKFVADERTNSILISGDPKVRERLKRLLIKQLDVEMAAGKN         | 265 |
|           | : : . . . . . * : : : : * . . . . . * : : : : * : : : : * . . . . .   |     |
|           |                                                                       |     |
| PA        | TRVIRLRHNDAKTLAETLGQISEGMKNNGGQGGEQTGGGRPSNILIRADESTNALVLLAD          | 340 |
| EC_K12    | TRVYYLYKAYATNLVEVLTGVSEKLDKDEKGNARKPSSSGAMDNVAITADEQTNSLVITAD         | 327 |
| KP        | TKVIYLYKAYAADLVEVLTGISSLSQDKQSARPVA--AIDKNIIKAHQGTNALIVTAA            | 323 |
| KO        | TKVIYLYKAYASDLVEVLTGISTMQSEKQAAPVA--ALDKNIIKAHQGTNALIVTAA             | 326 |
| EC_H10407 | SQVFYLYKSKAEDLVDVLKQVSGTLTAAKEEAEGTVGSG-REIVSIAASKHSNALIVTAP          | 342 |
| VC        | NRVYYLYKAYKAEDLVEVLKGVSENLAQAEKGTGQPTT-SK-RNEVMIAAHADTNSLVLTAP        | 323 |
|           | . : * * : : . * * : : * : : . . . . . * : : * * : : * * : : * * : : * |     |
|           |                                                                       |     |
| PA        | PDTVNALEDIVRQLDVPRAQVLVEAAIVEISGDIQDAVGVQVWAINKGGMGTKTNFANTG          | 400 |
| EC_K12    | QSVQEKLATVIARLDIRRAQVLVEAIIVEVQDGNLNLGVQWANKNVGAQ---QF-TNTG           | 383 |
| KP        | PDVMNDLERVIAQLDIRRPQVLVEAIIAEVQDADGLNLGIQWANKNAGMT---QF-TNSG          | 379 |
| KO        | PDVMNDLERVIAQLDIRRPQVLVEAIIAEVQDADGLNLGIQWANKNAGMT---QF-TNSG          | 382 |
| EC_H10407 | QDIMQSLQSVIEQLDIRRAQVHVEALIVEVAEGSNINFGVQWASKDAGLM---QFANGTQ          | 399 |
| VC        | QDIMNAMLEVIGQLDIRRAQVLEALIVEVAEGDGINLGVQWGSLESGSV---IQYGNTG           | 380 |
|           | . . . . . : : : : : * : : * * : : * * : : * * : : * * : : * * : : *   |     |

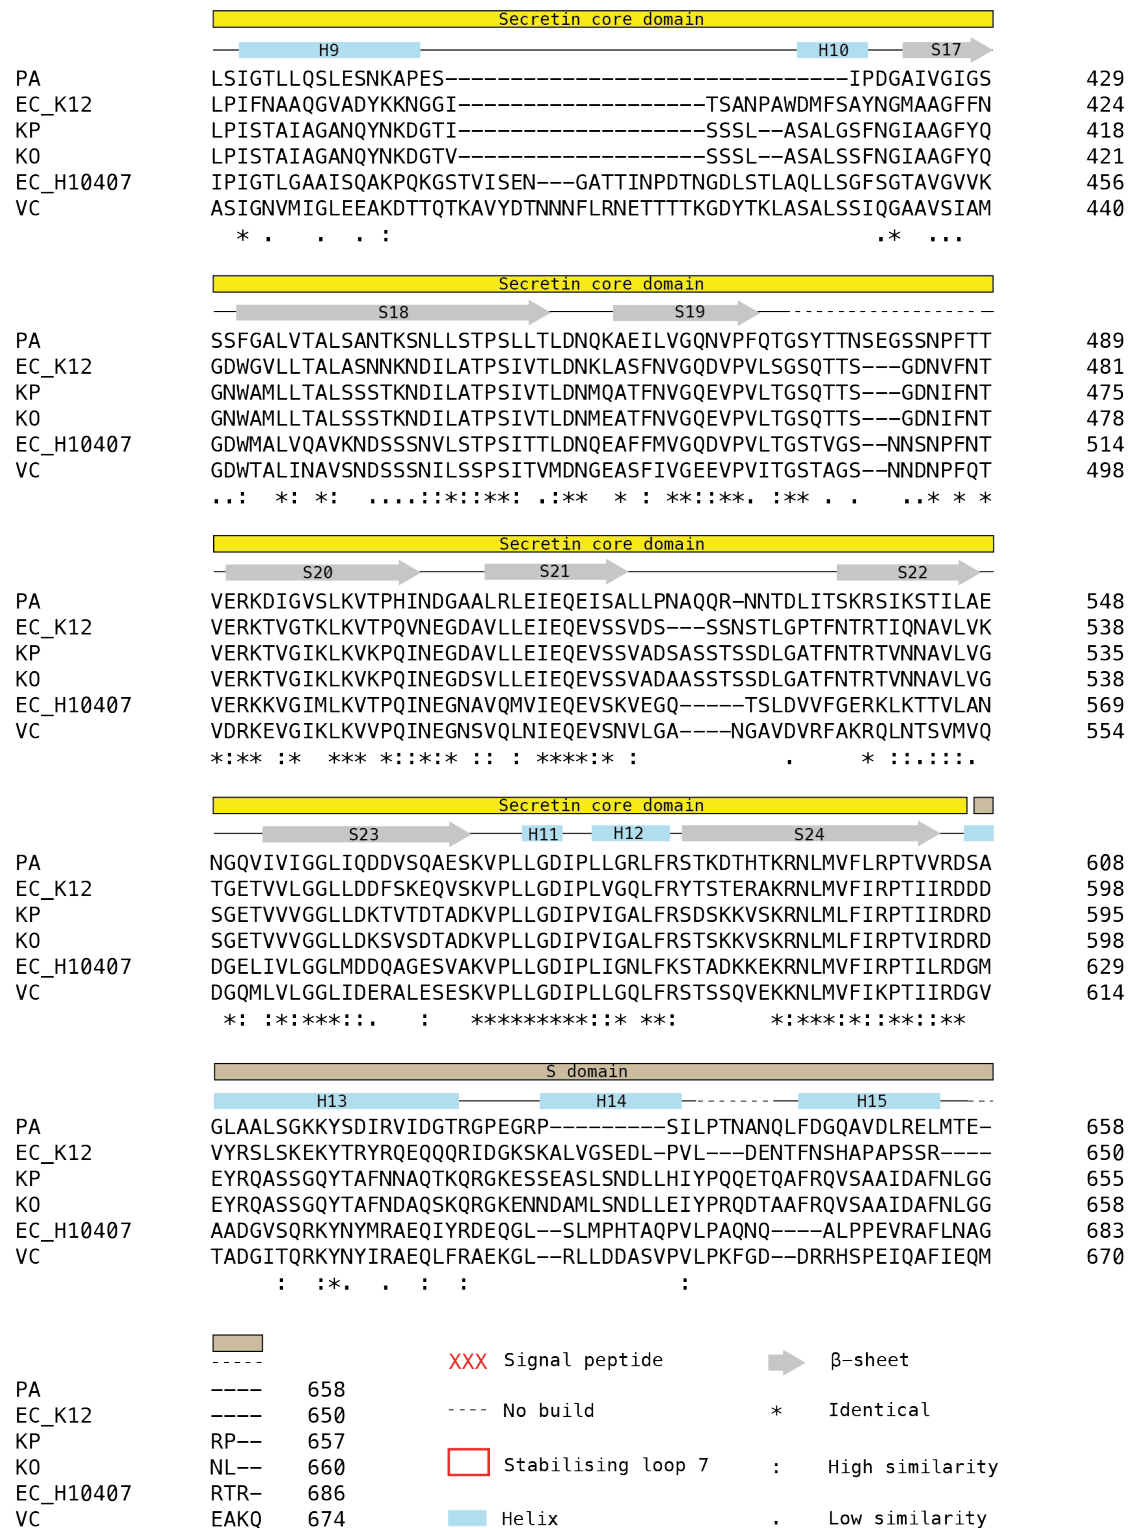

655

656 **Figure S3. PulD secondary structure assignment and sequence alignment.** Aligned PulD

657 sequences include *Pseudomonas aeruginosa* (PA, Uniprot code P35818), *Escherichia coli* K12

658 (EC\_K12, P45758), *Klebsiella pneumoniae* (KP, A0A0E1CJT4), *Klebsiella oxytoca* (KO,  
659 A0A0H3H6N4), *Escherichia coli* H10407 (EC\_H10407, E3PJ86), *Vibrio cholerae* (VC, P45779).

660

661

662

663

664

665

666

667

668

669

670

671

672

673

674

675

676

677

678

679

680

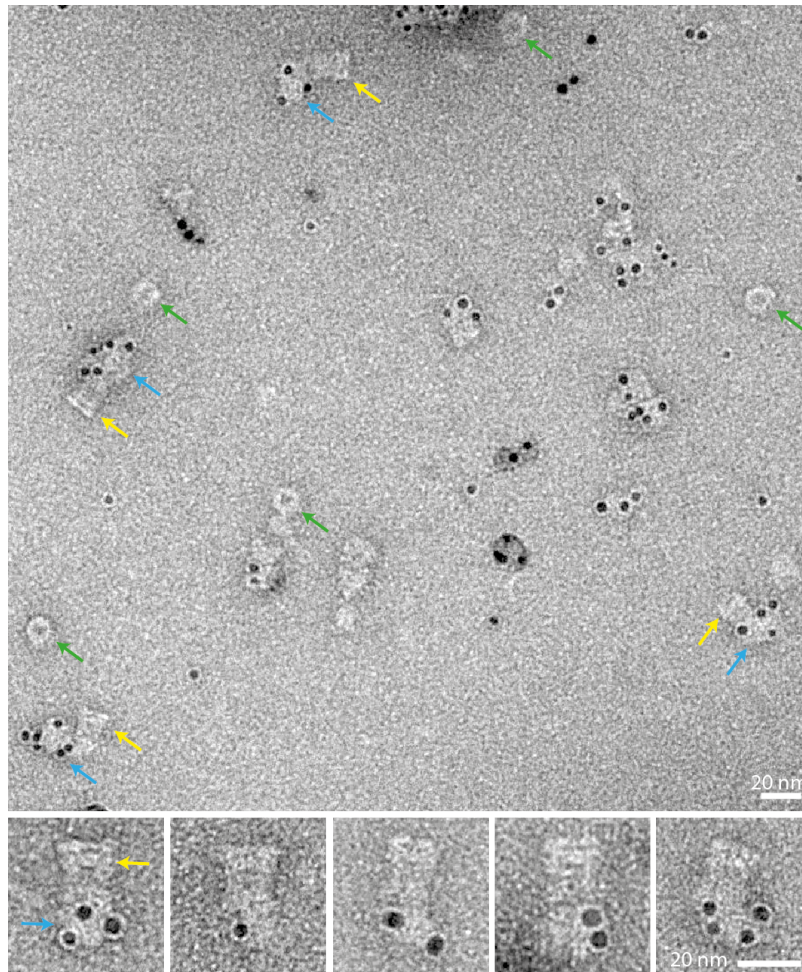

681

682 **Figure S4. PulC N-terminus is located in the inner membrane assembly platform (AP).**

683 An overview negative stain EM image with a gallery of selected particles underneath. The PulC

684 N-terminus was labelled with a hexahistidine tag at aa 61 within the PulC<sub>DELMNS</sub> complex. Ni-

685 NTA gold beads localize to the AP (blue arrow). Gold beads did not localize to the secretin

686 when attached to the AP (side view, yellow arrow) or when dissociated from the AP (top view,

687 green arrow).

688

689

690

691

692

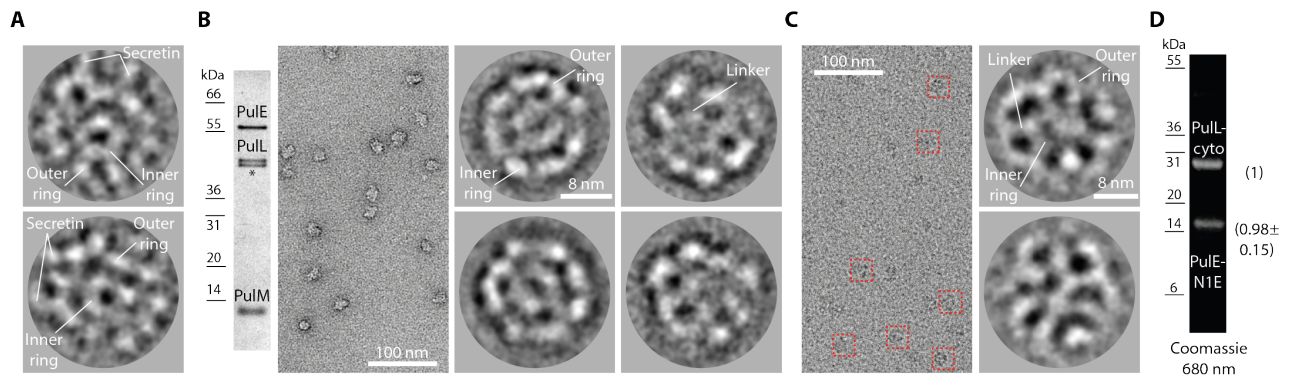

693

694 **Figure S5. 2D EM analysis of the Pul<sub>CDELMNS</sub> assembly platform (AP) and the Pul<sub>ELM</sub>**

695 **complex. (A)** Gallery of cryo-EM 2D class averages of the Pul<sub>CDELMNS</sub> complex where the

696 alignment and classification were focused on the AP only. A single preferred orientation was

697 observed consistent with a bottom or end view. The base of the masked-out secretin is visible

698 in the class averages. **(B)** GraFix purified Pul<sub>ELM</sub> complex and EM analysis. (Left) Silver stain

699 SDS-PAGE gel showing purified Pul<sub>ELM</sub> complex. PulN bound weakly to the complex and was

700 observed in only trace quantities after the GraFix ultracentrifugation step. (Right) Gallery of

701 negative stain EM 2D class averages of the Pul<sub>ELM</sub> complex. The same single preferred

702 orientation was observed as in **A**. **(C)** Gallery of cryo-EM 2D class averages of the Pul<sub>ELM</sub>

703 complex. Note how the concentric ring ultrastructure is equivalent in both negative stain (as

704 in **B**) and under cryo conditions. **(D)** SDS-PAGE of purified Pul<sub>E-N1E/Lcyto</sub> complex. Fluorescent

705 emission Coomassie R250 stained gel imaged at 680 nm with associated stoichiometry and

706 standard deviation in parentheses. Stoichiometry measurements were determined from two

707 independent purifications.

708

709

710

711



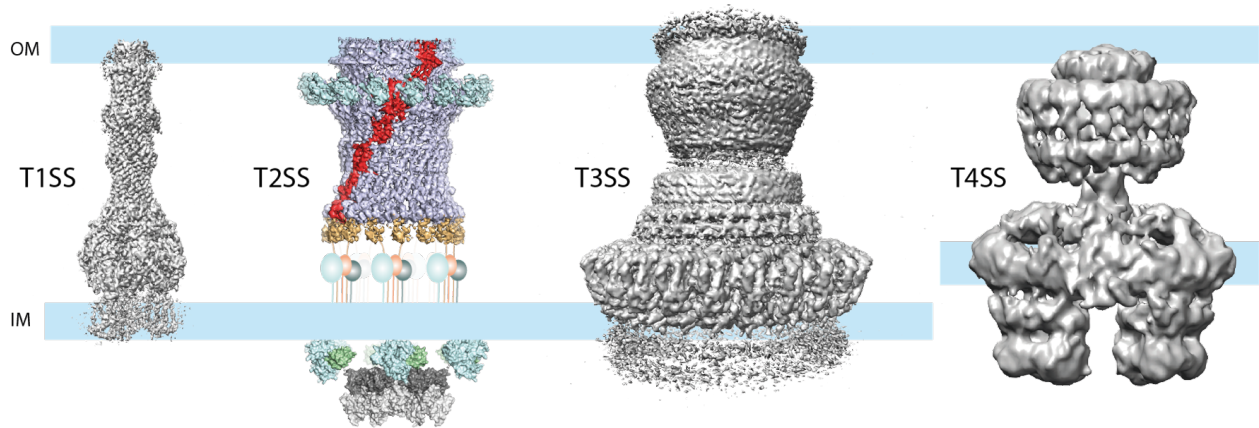

712

713 **Figure S6. Comparison of bacterial type I-IV secretion systems.** Substrate passes in an

714 enclosed channel across the entire cell envelope in the type I (EMD 8636) and III (EMD 8400)

715 secretion systems<sup>38,41</sup>. In the T2SS, the substrate must enter the periplasm before outer

716 membrane translocation through the secretin channel. In the type IV secretion system<sup>36</sup>, it is

717 still unclear whether substrate passes across the cell envelope directly from the cytoplasm or

718 is loaded first into the periplasm before being secreted.

719

720

721

722

723

724

725

726

727

728

729

730

731

732

733

734 **Supplementary Table 1. 3D reconstruction and refinement statistics**

735

736 **Data collection**

|     |                                                     |             |  |
|-----|-----------------------------------------------------|-------------|--|
| 737 | Electron microscope                                 | Titan Krios |  |
| 738 | Voltage (kV)                                        | 300         |  |
| 739 | Pixel size (Å)                                      | 1.78        |  |
| 740 | Electron exposure (e <sup>-</sup> /Å <sup>2</sup> ) | 50          |  |
| 741 | Defocus range (µm)                                  | 2-4.5       |  |
| 742 | Images                                              | 3427        |  |

743

744 **3D reconstruction**

|     |                            |       |  |
|-----|----------------------------|-------|--|
| 745 | Final particles            | 7284  |  |
| 746 | Resolution (Å)             | 4.3   |  |
| 747 | FSC threshold              | 0.143 |  |
| 748 | B factor (Å <sup>2</sup> ) | -142  |  |

749

750 **Refinement**

|     |                         |       |                                     |
|-----|-------------------------|-------|-------------------------------------|
| 751 | Model                   | PulD* | PulD*-PulS-PulC                     |
| 752 |                         |       |                                     |
| 753 | Homology model template |       | PulC HR- PDB 3OSS<br>PulS- PDB 4K0U |
| 754 |                         |       |                                     |

755 **Model composition**

|     |                |       |       |
|-----|----------------|-------|-------|
| 756 | Total atoms    | 64920 | 85170 |
| 757 | Total residues | 8655  | 11295 |

758

759 **R.m.s. deviations**

|     |                 |       |       |
|-----|-----------------|-------|-------|
| 760 | Bond length (Å) | 0.011 | 0.011 |
| 761 | Angles (°)      | 1.4   | 1.3   |

762

763 **Validation**

|     |                   |       |       |
|-----|-------------------|-------|-------|
| 764 | MolProbity score  | 2.66  | 2.58  |
| 765 | Clashscore        | 38.01 | 36.54 |
| 766 | Poor rotamers (%) | 0     | 0     |

767

768 **Ramachandran plot**

|     |              |       |       |
|-----|--------------|-------|-------|
| 769 | Favored (%)  | 88.07 | 90.01 |
| 770 | Outliers (%) | 0     | 0     |

771

772 **B-factors/ADPs**

|     |         |       |       |
|-----|---------|-------|-------|
| 773 | Minimum | 36.5  | 36.5  |
| 774 | Maximum | 294.9 | 425.3 |
| 775 | Mean    | 103.7 | 161.5 |

776

777 **Real-space correlation**

|     |              |      |      |
|-----|--------------|------|------|
| 778 | Masked map   | 0.78 | 0.73 |
| 779 | Unmasked map | 0.76 | 0.71 |

780

781 \*identical models

782 **Supplementary Table 2. Cloning primers**

783

|     |                      |                                                    |
|-----|----------------------|----------------------------------------------------|
| 784 | Primer pair 1        | taacgagggcaaaaaatgccagtttctgtgatgaggttaacaaata     |
| 785 |                      | aggtaacgcttattactagaccatctgctgccagagaaaaata        |
| 786 |                      |                                                    |
| 787 | Primer pair 2        | taataagcttgacctggaagtg                             |
| 788 | (pASK3c)             | ttttgccctcggtatctagattttg                          |
| 789 |                      |                                                    |
| 790 | Primer pair 3        | ccaccgcagttcgaaaaataagatggccctgttcgctatcaggcg      |
| 791 |                      | tcgaactgcgggtggctccagacgcttccgctgttgctgttcg        |
| 792 |                      |                                                    |
| 793 | Primer pair 4        | aggagatataccatgattcatttttgattactctatgatg           |
| 794 |                      | tgttcgacttaagcattagctgctgcgcaagctggc               |
| 795 |                      |                                                    |
| 796 | Primer pair 5        | tgcttaagtcgaacagaaagtaatc                          |
| 797 | (pCDF-duet)          | catggtatatctcctattaaag                             |
| 798 |                      |                                                    |
| 799 | Primer pair 6        | actacaaagacgatgacgacaagtaatgcttaagtcgaacagaaagtaat |
| 800 |                      | catcgtctttgtagtcggatccgctcgtcgcgcaagctggcaata      |
| 801 |                      |                                                    |
| 802 | Primer pair 7        | taacgagggcaaaaaatgacgccagccgccgaacgccgt            |
| 803 |                      | gtggctccaagcgtgacgcttccgctgttgctgttcggtg           |
| 804 |                      |                                                    |
| 805 | Primer pair 8        | agcgcttgagccaccgcagttc                             |
| 806 | (pASK3c)             | ttttgccctcggtatctagattttg                          |
| 807 |                      |                                                    |
| 808 | Primer pair 9        | aggagatataccatgaacaagattaatgcttctcccaggcc          |
| 809 |                      | ttttagtcggatccttttgcctctgtgtaaccattttccctg         |
| 810 |                      |                                                    |
| 811 | Primer pair 10       | ggatccgactacaaagacgat                              |
| 812 | (pCDF-duet/flag tag) | catggtatatctcctattaaag                             |
| 813 |                      |                                                    |
| 814 | Primer pair 11       | taacgagggcaaaaaatgacgccagccgccgaacgccgtcc          |
| 815 |                      | gtggctccaagcgtgctgctcgcagcagatcgtcgggtgccg         |
| 816 |                      |                                                    |
| 817 | Primer pair 12       | aggagatataccatgaacaagattaatgcttctcccaggcc          |
| 818 |                      | ttttagtcggatccggcgaactccccctgcagcagactga           |
| 819 |                      |                                                    |
| 820 | Primer pair 13       | catcaccatcatcaccactaattgccaaccatgaaaagcctgcgaaaaat |
| 821 |                      | gtgatgatggtgatggccttcatccccagcgcgaaagcaatatcgtgtc  |
| 822 |                      |                                                    |

823

824

825

826

827

828

829

## 830 **Methods**

831 **Cloning, protein expression and purification.** All clones were generated using a  
832 modified version of the Gibson isothermal DNA assembly protocol<sup>42</sup> where the *Taq* DNA  
833 ligase was omitted from the one-step isothermal DNA assembly. To obtain the Pul<sub>CDELMNS</sub>  
834 complex, the *Klebsiella pneumoniae* T2SS operon encoding genes from *pulC* to *pulO* was  
835 cloned into pASK3c vector (IBA-GO) using primer pair 1 and 2 (for all primers used see  
836 Supplementary Table 2). A StrepII tag was then added at the C-terminus of PulE using  
837 primer pair 3. The *pulS* gene was cloned into pCDF-duet vector using primer pair 4 and  
838 5. A C-terminal Flag tag was then inserted using primer pair 6. Uniprot codes for  
839 individual genes are as follows: *pulC* KPHS\_08880, *pulD* KPHS\_08870, *pulE* KPHS\_08860,  
840 *pulF* KPHS\_08850, *pulG* KPHS\_08840, *pulH* KPHS\_08830, *pulI* KPHS\_08820, *pulJ*  
841 KPHS\_08810, *pulK* KPHS\_08800, *pulL* KPHS\_08790, *pulM* KPHS\_08780, *pulN*  
842 KPHS\_08770, *pulO* KPHS\_08760, *pulS* KPHS\_08940. The clones were co-transformed into  
843 *Escherichia coli* C43 (DE3) electro-competent cells (Lucigen) modified here to  
844 incorporate a *pspA* gene knockout using a Lambda Red recombinase strategy<sup>43</sup> (*PspA* is a  
845 common contaminant induced by PulD over-expression). Cells were grown on selective  
846 LB-agarose plates with chloramphenicol (30 µg/ml) and spectinomycin (50 µg/ml). 2xYT  
847 media was inoculated and cells grown at 37°C until induction at OD<sub>600</sub> = 0.5-0.6 with  
848 anhydrotetracycline (AHT, 0.2 mg/L) and isopropyl β-D-1-thiogalactopyranoside (IPTG,  
849 0.24 g/L). Cells were grown for ~15 hr at 19 °C and processed immediately. Pellets were  
850 re-suspended in ice-cold buffer 50 mM Tris-HCl pH 7.5, 5 mM EDTA, treated with DNase  
851 I, lysozyme and sonicated on ice. The lysate was clarified by centrifugation at 16,000g for  
852 20 min. The membrane fraction was collected by centrifugation at 142,000g for 45 min.  
853 Membranes were mechanically homogenized and solubilized in 50 mM Hepes-NaOH pH  
854 7.5, 150 mM NaCl, 1 % w/v DDM (Anatrace) and 5 mM EDTA at room temperature for 30-

855 40 min. The suspension was clarified by centrifugation at 132,000g for 15 min. The  
856 supernatant was loaded onto a StrepTrap HP column (GE Healthcare) and washed with  
857 50 mM Hepes-NaOH pH 7.5, 150 mM NaCl, 0.06 % w/v DDM and 5 mM EDTA (Buffer W)  
858 at 4 °C. All prior buffers were supplemented with EDTA-free cOmplete protease inhibitor  
859 tablets (Roche). The protein sample was eluted in Buffer W supplemented with 2.5 mM  
860 desthiobiotin (IBA) but with protease inhibitors removed. Peak fractions were pooled,  
861 0.05 % glutaraldehyde (Sigma- EM grade) added and incubated on ice for 10 min before  
862 quenching with 100 mM Tris-HCl pH 7.5. The sample was batch incubated with Flag resin  
863 (Sigma) for 1 hr. Flag resin was washed with Buffer W and then eluted with the same  
864 buffer supplemented with 3xFlag peptide. Peak fractions were collected and used  
865 immediately. LC-MS/MS confirmed the identity of bands identified by SDS-PAGE.

866 To obtain purified Pul<sub>ELMN</sub> complex, the full-length *pulE* gene was cloned into  
867 pASK3c vector to include a C-terminal StrepII tag (primer pair 7 and 8). The *pull*, *pulM*  
868 and *pulN* region of the T2SS operon was cloned into pCDF-duet vector with a PulN C-  
869 terminal Flag tag (primer pair 9 and 10). These vectors were co-transformed and the  
870 same initial purification strategy was then followed as for the Pul<sub>CDELMNS</sub> complex with  
871 the exception that no glutaraldehyde or Tris quenching buffer were added subsequent to  
872 elution from the Strep column. Protease inhibitor tablets were included in all buffers.  
873 After elution from the Flag column, due to sample heterogeneity as judged by negative  
874 stain EM, GraFix<sup>32</sup> was undertaken. Using Beckman Ultra-Clear 4.2 ml 11x60 mm  
875 ultracentrifugation tubes 2.1 ml of 50 mM Hepes-NaOH, 150 mM NaCl, 0.06 % w/v DDM,  
876 30 % v/v glycerol, 5 mM EDTA and 0.1 % glutaraldehyde was loaded under 2.1 ml of the  
877 equivalent but with 10 % v/v glycerol. A continuous gradient was made using a BioComp  
878 Gradient Master cycle set for 66 seconds at 83° tilt and 22 rpm. An equivalent gradient  
879 was also made but omitting glutaraldehyde so that the sample could be analysed by SDS-

880 PAGE after centrifugation. The Pul<sub>ELMN</sub> sample was split in half and loaded onto the  
881 gradients  $\pm$ glutaraldehyde. Samples were spun at 71,000g for 16 hr at 4°C using a  
882 Beckman Ti 60.1 swing rotor. 150  $\mu$ l fractions were collected manually and analysed.  
883 Note that PulN was generally lost from the Pul<sub>ELMN</sub> complex during GraFix yielding just  
884 Pul<sub>ELM</sub>.

885 To obtain purified Pul<sub>E-N1E/Lcyto</sub> complex, the N1E domain comprising aa 1-108  
886 from *pule* were cloned into pASK3c vector to include a C-terminal StrepII tag (primer pair  
887 8 and 11). For Pul<sub>Lcyto</sub>, aa 1-235 relating to the cytoplasmic domain of Pull were cloned  
888 into pCDF-duet vector with a C-terminal Flag tag (primer pair 10 and 12). The same 2-  
889 step affinity chromatography purification strategy was then followed as for Pul<sub>ELMN</sub> but  
890 excluding Grafix. Note that the Pul<sub>E-N1E/Lcyto</sub> complex readily purifies from the membrane  
891 fraction despite the removal of the Pull trans-membrane domain.

892 **Gold labelling.** This was performed on the Pul<sub>CDELMNS</sub> complex modified to include a  
893 hexahistidine tag within PulC after aa 61 (primer pair 13). Purification was the same as  
894 for the Pul<sub>CDELMNS</sub> complex but without the addition of fixative. Protease inhibitor tablets  
895 were included in all buffers. 5 nm Ni-NTA-Nanogold (Nanoprobes) pre-washed in Buffer  
896 W was added to 10  $\mu$ l of the protein sample and incubated for 30 min at 4 °C. A homemade  
897 continuous carbon grid was deposited on the 10  $\mu$ l sample for 3 min, blotted and washed  
898 2 times in Buffer W supplemented with 10 mM imidazole, then 2 times in Buffer W before  
899 being stained with 3 drops of 2 % uranyl acetate.

900 **Stoichiometry determination.** Pul<sub>CDELMNS</sub> complex was purified as above with the  
901 exception that no glutaraldehyde or Tris quenching buffer were added subsequent to  
902 elution from the Strep column. Protease inhibitor tablets were included in all buffers. Six  
903 independent purifications were extracted using phenol to disrupt PulD  
904 multimerization<sup>44</sup>. Before extraction samples were divided and phenol treated in

905 duplicate. The samples were precipitated with an equal volume of phenol and  
906 immediately vortexed. Four volumes of ice cold acetone were then added and vortexed  
907 again. The mixture was kept overnight at -20 °C. The precipitate was pelleted in a bench-  
908 top centrifuge at 14,000 g for 30 min at 4 °C, washed once with ice cold acetone, dried  
909 under vacuum and resuspended in loading buffer supplemented with 10 mM DTT. Both  
910 duplicates for each independent purification were analyzed by SDS-PAGE densitometry  
911 and quantification of fluorescent emission using both Coomassie Blue R250 and Sypro  
912 Ruby dyes. The Coomassie R250 procedure was as described<sup>24</sup> but with extended stain  
913 and destaining times. Briefly, gels were rinsed with water and then stained with 0.01%  
914 Coomassie Blue R250 in 50% methanol and 10% acetic acid for 20 min. Gels were rinsed  
915 with 40% methanol and 7% acetic acid and then destained twice with the same solution  
916 for 20 min each time. Finally, gels were soaked in 2-3 times in water until fully destained,  
917 usually 1-2 hours. Gels were imaged on a Licor Odyssey Fc at 680 nm. Sypro Ruby gel  
918 staining was undertaken following the manufacturer's instructions (Biorad). Gels were  
919 imaged on a Biorad Chemidoc XRS imaging system at 302 nm. Image Lab software  
920 (BioRad) and ImageJ were used to calculate band intensities.

921 To determine the stoichiometry of the Pul<sub>E-N1E/Lcyto</sub> complex, two independent  
922 purifications were undertaken. Samples were run in duplicate on gels and then stained  
923 using the Coomassie Blue R250 procedure as outlined above. Gels were imaged on a Licor  
924 Odyssey Fc at 680 nm.

925 **Electron microscopy sample preparation and data collection.** For outer membrane  
926 complex (OMC) structure determination, 4 µl of purified Pul<sub>CDELMNS</sub> complex solution was  
927 incubated for 30 seconds on glow discharged homemade continuous thin carbon grids  
928 before vitrification in liquid ethane using a Vitrobot Mark IV (FEI). Data was collected at  
929 300 kV on a Titan Krios (M02 beamline at eBIC Diamond, UK) equipped with a Gatan

930 Quantum K2 Summit detector. Images were acquired at a magnification of 28,090  
931 yielding 1.78 Å/pixel using EPU software. Images were dose-weighted over 40 frames  
932 with 12 second exposures. Total dose was  $\sim 50 \text{ e}/\text{Å}^2$ .

933 All other cryo and negative stain datasets were collected in-house at 200 kV on a  
934 Tecnai F20 microscope equipped with Falcon II direct electron detector. For cryo data,  
935 Pul<sub>CDELMNS</sub> complex (Figure 6B-C and Figure S5A) was vitrified as described above. The  
936 Pul<sub>ELM</sub> GraFix treated sample required glycerol removal so that 4 µl of sample was loaded  
937 onto the glow discharged continuous carbon EM grid and after 1 min incubation was  
938 washed 4 times in Buffer W before plunge freezing. Images were acquired at a  
939 magnification of 90,909 yielding 1.65 Å/pixel using EPU software. Images were collected  
940 over 54 frames with 3 second exposures. Total dose was  $\sim 50 \text{ e}/\text{Å}^2$ . For negative stain  
941 data, 4 µl of Pul<sub>CDELMNS</sub> complex was loaded onto the glow discharged continuous carbon  
942 EM grid, after 40 seconds the grid was washed with 3 drops of distilled water and stained  
943 with 3 drops of 2 % uranyl acetate. Pul<sub>ELM</sub> GraFix treated sample was similarly incubated  
944 on EM grids, washed iteratively with 4 drops of 15 µl Buffer W and then negatively  
945 stained as above. Images were acquired at a magnification of 90,909 using EPU software.  
946 Single frames were collected with 1 second exposure and total dose  $\sim 15 \text{ e}/\text{Å}^2$ .

947 **Image processing.** For OMC structure determination, individual movie image frames  
948 were aligned with MotionCor2<sup>45</sup> and the contrast transfer function estimated using Gctf  
949 1.06<sup>46</sup>. Low quality images were discarded and 3427 micrographs used for subsequent  
950 reconstruction in Relion 2.1<sup>47</sup>. Initial manual particle picking was focused on the  
951 OMC/secretin region of the Pul<sub>CDELMNS</sub> complex. For particle extraction a box and mask  
952 diameter were chosen so that contributions from the inner membrane assembly platform  
953 (AP) were excluded. In this way, low-resolution 2D class averages of just the OMC were  
954 used as a template for auto-picking. OMC side views only were prevalent in this dataset,



955 which provided a sufficiently even equatorial band distribution for a reliable  
956 reconstruction<sup>48</sup>. Low quality particles were removed by 4 rounds of 2D classification  
957 resulting in a stack of 36,240 particles. A single round of 3D classification was undertaken  
958 generating 10 classes. The *Vibrio cholerae* GspD reconstruction EMD-1763 was used as  
959 an initial model filtered to 40 Å<sup>49</sup>. C15 symmetry was applied based on top views of the  
960 OMC (obtained in an alternative Pul<sub>CDELMNS</sub> complex purification) and an unambiguous 15  
961 peaks observed from the rotation auto-correlation function calculation (Figure 1C). A  
962 single class containing 7284 particles was used for the final refinement, which attained  
963 4.4 Å resolution. Post-processing yielded 4.3 Å resolution with an auto-estimated B-factor  
964 <sup>50</sup> of -142 Å<sup>2</sup> applied to sharpen the final 3D map for model building. A locally sharpened  
965 map was also generated using LocScale<sup>39</sup> once initial models were built. Further particle  
966 polishing and 3D refinement did not yield a marked increase in resolution. Resolutions  
967 reported are based on gold standard Fourier shell correlations (FSC) = 0.143. Statistics  
968 for data collection and 3D refinement are included in Supplementary Table 1. Local 3D  
969 refinements with various particle subtraction strategies focusing on PulS or PulC HR  
970 domain did not markedly improve resolution.

971 To generate all other 2D class averages both in cryo and negative stain conditions  
972 as for Pul<sub>CDELMNS</sub> and Pul<sub>ELM</sub> complexes, the following protocol was followed. Working  
973 initially within Relion 2.0 or 2.1, Gctf 1.06 was used for estimating the CTF. Negative stain  
974 micrographs were phase flipped. Low quality micrographs were discarded. Initial 2D  
975 class averages were generated from a manually picked stack to yield templates for  
976 autopicking. 3-4 rounds of 2D classification were then undertaken to remove low quality  
977 particles. Using the 'relion\_stack\_create' a cleaned image stack was generated for further  
978 processing. For cryo-EM images the stack was created from phase flipped particles. In  
979 Imagic<sup>51</sup>, particles were normalised, band pass filtered, centred and subjected to

980 reference-free MSA and classified. The best classes, typically judged by lowest variance,  
981 were used as references for multi-reference alignment (MRA) in Spider<sup>52</sup> followed by  
982 MSA and classification in Imagic. This cycle of MRA and MSA was typically iterated a  
983 further 2-3 times. For negative stain Pul<sub>ELM</sub> data, 2746 micrographs yielded 81,727  
984 extracted particles and a cleaned stack of 63,014 particles. For cryo Pul<sub>ELM</sub> data, 467  
985 micrographs yielded 4937 hand-picked particles, and all particles were used for  
986 subsequent MSA and MRA. For Pul<sub>CDELMNS</sub>, 3059 micrographs yielded 89,381 extracted  
987 particles and a cleaned stack of 66,855 particles for subsequent MSA and MRA (Figure  
988 6B). From this same dataset, 1148 micrographs were then used to hand-pick 4020 AP-  
989 focused particles (Figure 6C and Figure S5A). Rotation auto-correlation functions were  
990 calculated using Imagic.

991 **Model building.** A PulD homology model was generated with I-Tasser<sup>53</sup> using the *E. coli*  
992 GspD PDB 5WQ7 as a template. This yielded a starting model for the secretin core, and  
993 N3, N2 and N1 domains. *E. coli* GspD shares 57 % sequence identity with PulD. A  
994 homology model for the N0 domain was generated using Swissmodel<sup>54</sup> with the relevant  
995 part of 3OSS as a template (51 % sequence identity). Homology models were rigid body  
996 fitted into the map using Chimera<sup>55</sup> Fit in Map function. Using these models as a starting  
997 guide and the side chain detail from bulky residues to confirm sequence register, Coot<sup>56</sup>  
998 was used to manually build a complete model for PulD aa 27-652 excluding aa 288-303,  
999 462-470 and 632-637. The model was further refined using real-space refinement in  
1000 Phenix<sup>57</sup> with secondary structure, geometry and NCS restraints applied. For the low-  
1001 resolution regions specific to the PulC HR domain, a homology model based on ETEC GspC  
1002 HR domain PDB 3OSS (27 % sequence identity) was generated using Swissmodel. For  
1003 fitting this homology model, the PDB 3OSS which includes the ETEC GspD N0 domain was  
1004 first superimposed onto the PulD N0 domain. The PulC HR domain homology model was

1005 then superimposed onto the ETEC GspC HR domain from PDB 3OSS resulting in a near  
1006 perfect fit within the map. The Chimera Fit in Map function was then applied to PulC HR  
1007 domain resulting in a minor shift so that the PulC HR-PulD N0 domain complex has a  
1008 RMSD  $C\alpha = 1.4 \text{ \AA}$  when aligned to PDB 3OSS (Figure S2C). For the low-resolution regions  
1009 specific to the PulD S-domain C-terminus (aa 638-652) in complex with the PulS pilotin,  
1010 a homology model was generated using Swissmodel based on the equivalent structure  
1011 from *Dickeya didantii* PDB 4K0U (>50 % sequence identity for both chains). The map was  
1012 low pass filtered to  $8 \text{ \AA}$  and the homology model initially fitted manually so that the PulS  
1013 lipidated N-terminus orientated towards the membrane. The Chimera Fit in Map function  
1014 was then used for final positioning. Cross-validations were carried out as previously  
1015 described<sup>10,58</sup> using the auto-estimated B-factor sharpened map. Briefly, the PulD  
1016 secretin model was displaced randomly by  $0.2 \text{ \AA}$  and then refined against a map  
1017 reconstructed from one of the independent data halves (Half map 1). FSC curves were  
1018 then calculated using the resulting model and Half map 1 ( $FSC_{\text{work}}$ ). FSC curves were also  
1019 calculated between this same model and another reconstruction generated from the  
1020 other independent data half (Half Map 2 and  $FSC_{\text{free}}$ ). The similarity between  $FSC_{\text{work}}$  and  
1021  $FSC_{\text{free}}$  curves indicates an absence of overfitting within the PulD secretin model (Figure  
1022 S1D). The final models were assessed using Molprobit<sup>59</sup> and statistics outlined in  
1023 Supplementary Table 1.

1024

- 1025 42. Gibson, D.G. et al. Enzymatic assembly of DNA molecules up to several hundred  
1026 kilobases. *Nature Methods* **6**, 343-345 (2009).
- 1027 43. Datsenko, K.A. & Wanner, B.L. One-step inactivation of chromosomal genes in  
1028 *Escherichia coli* K-12 using PCR products. *Proc Natl Acad Sci USA* **97**, 6640-6645  
1029 (2000).
- 1030 44. Nouwen, N. et al. Secretin PulD: association with pilotin PulS, structure, and ion-  
1031 conducting channel formation. *Proc Natl Acad Sci USA* **96**, 8173-8177 (1999).
- 1032 45. Zheng, S.Q. et al. MotionCor2: anisotropic correction of beam-induced motion for  
1033 improved cryo-electron microscopy. *Nat Methods* **14**, 331-332 (2017).

- 1034 46. Zhang, K. Gctf: Real-time CTF determination and correction. *J Struct Biol* **193**, 1-12  
1035 (2016).
- 1036 47. Scheres, S.H. RELION: implementation of a Bayesian approach to cryo-EM  
1037 structure determination. *J Struct Biol* **180**, 519-30 (2012).
- 1038 48. Orlova, S. S. Theory of three-dimensional reconstruction. 1. Conditions of a  
1039 complete set of projections. *Sov phys, cryst* **20**, 312-314 (1975).
- 1040 49. Reichow, S.L., Korotkov, K.V., Hol, W.G. & Gonen, T. Structure of the cholera toxin  
1041 secretion channel in its closed state. *Nat Struct Mol Biol* **17**, 1226-32 (2010).
- 1042 50. Rosenthal, P.B. & Henderson, R. Optimal determination of particle orientation,  
1043 absolute hand, and contrast loss in single-particle electron cryomicroscopy. *J Mol*  
1044 *Biol* **333**, 721-45 (2003).
- 1045 51. van Heel, M., Harauz, G., Orlova, E. V., Schmidt, R. & Schatz, M. A new generation of  
1046 the IMAGIC image processing system. *J Struct Biol* **116**, 17-24 (1996).
- 1047 52. Frank, J. *et al.* SPIDER and WEB: Processing and visualization of images in 3D  
1048 electron microscopy and related fields. *J Struct Biol* **116**, 190-199 (1996).
- 1049 53. Zhang, Y. I-TASSER server for protein 3D structure prediction. *BMC Bioinformatics*  
1050 **9**, 40 (2008).
- 1051 54. Waterhouse, A. *et al.* SWISS-MODEL: homology modelling of protein structures  
1052 and complexes. *Nucleic Acids Res* **46**, W296-W303 (2018).
- 1053 55. Pettersen, E.F. *et al.* UCSF Chimera--a visualization system for exploratory  
1054 research and analysis. *J Comput Chem* **25**, 1605-12 (2004).
- 1055 56. Emsley, P., Lohkamp, B., Scott, W.G. & Cowtan, K. Features and development of  
1056 Coot. *Acta Crystallogr D Biol Crystallogr* **66**, 486-501 (2010).
- 1057 57. Adams, P.D. *et al.* PHENIX: a comprehensive Python-based system for  
1058 macromolecular structure solution. *Acta Crystallogr D Biol Crystallogr* **66**, 213-21  
1059 (2010).
- 1060 58. Li, N.N. *et al.* Structure of the eukaryotic MCM complex at 3.8 angstrom. *Nature*  
1061 **524**, 186-191 (2015).
- 1062 59. Chen, V.B. *et al.* MolProbity: all-atom structure validation for macromolecular  
1063 crystallography. *Acta Crystallogr D Biol Crystallogr* **66**, 12-21 (2010).
- 1064
